# Supplementary material for: DFT studies on the mechanism of palladium-catalyzed carbon–silicon cleavage for the synthesis of benzosilole derivatives
Source: Royal Society of Chemistry journal article supplement (doi:10.1039/c3dt53391c), 2014-01-01
Supplement: c3dt53391c1.pdf [file c3dt53391c1.pdf]

## Supplementary Information

### DFT studies on the mechanism of palladium–catalyzed carbon–silicon cleavage for the synthesis of benzosilole derivatives

Wen-Jie Chen and Zhenyang Lin\*

*Department of Chemistry , The Hong Kong University of Science and Technology, Clear  
Water Bay, Kowloon, Hong Kong, People's Republic of China*

**Author Email Address:** [chzlin@ust.hk](mailto:chzlin@ust.hk)

#### **Contents:**

- (1) Complete Reference for Ref (19) (page S2).
- (2) The energy profiles calculated for Paths 1 and 2 with associative mechanism (page S3).
- (3) Cartesian coordinates and total energies for all of the calculated structures (page S4).

**Complete Reference for Ref (19):**

Frisch, M. J.; Trucks, G. W.; Schlegel, H. B.; Scuseria, G. E.; Robb, M. A.; Cheeseman, J. R.; Montgomery, J. A., Jr.; Vreven, T.; Kudin, K. N.; Burant, J. C.; Millam, J. M.; Iyengar, S. S.; Tomasi, J.; Barone, V.; Mennucci, B.; Cossi, M.; Scalmani, G.; Rega, N.; Petersson, G. A.; Nakatsuji, H.; Hada, M.; Ehara, M.; Toyota, K.; Fukuda, R.; Hasegawa, J.; Ishida, M.; Nakajima, T.; Honda, Y.; Kitao, O.; Nakai, H.; Klene, M.; Li, X.; Knox, J. E.; Hratchian, H. P.; Cross, J. B.; Bakken, V.; Adamo, C.; Jaramillo, J.; Gomperts, R.; Stratmann, R. E.; Yazyev, O.; Austin, A. J.; Cammi, R.; Pomelli, C.; Ochterski, J. W.; Ayala, P. Y.; Morokuma, K.; Voth, G. A.; Salvador, P.; Dannenberg, J. J.; Zakrzewski, V. G.; Dapprich, S.; Daniels, A. D.; Strain, M. C.; Farkas, O.; Malick, D. K.; Rabuck, A. D.; Raghavachari, K.; Foresman, J. B.; Ortiz, J. V.; Cui, Q.; Baboul, A. G.; Clifford, S.; Cioslowski, J.; Stefanov, B. B.; Liu, G.; Liashenko, A.; Piskorz, P.; Komaromi, I.; Martin, R. L.; Fox, D. J.; Keith, T.; Al-Laham, M. A.; Peng, C. Y.; Nanayakkara, A.; Challacombe, M.; Gill, P. M. W.; Johnson, B.; Chen, W.; Wong, M. W.; Gonzalez, C.; Pople, J. A. *Gaussian 03*; Revision E. 01; Gaussian, Inc.: Wallingford, CT, 2004.

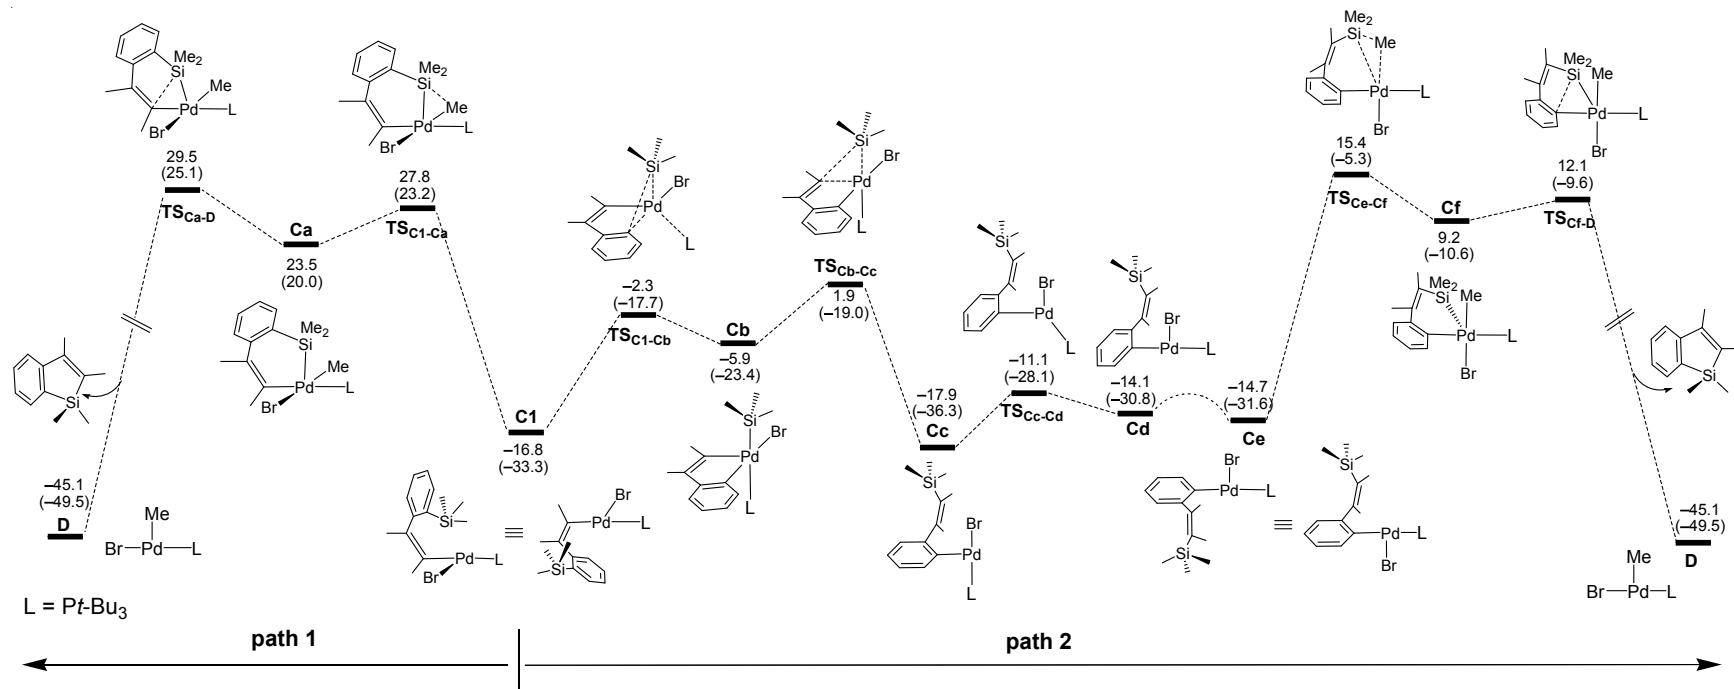

Figure S1. The energy profiles calculated for Paths 1 and 2 with an associative mechanism. The solvation-corrected relative free energies and electronic energies (in parentheses) are given in kcal/mol.

Figure S1 shows an associative mechanism, in which  $Pt-Bu_3$  ligand stays attached to the metal center from the complex **C1** to **D** in Paths 1 and 2. The overall barriers of the whole process were calculated to be 29.5 kcal/mol for Path 1 and 33.3 kcal/mol for Path 2, indicating that a dissociative mechanism shown in the text (Figure 2) is much more favorable. Therefore, we only discussed the free energy profiles calculated for Paths 1 and 2 involving a dissociative mechanism.



|   |          |          |          |   |          |          |          |
|---|----------|----------|----------|---|----------|----------|----------|
| 1 | 5.134375 | 0.701369 | 0.988491 | 6 | 1.860753 | 2.272904 | 1.620528 |
| 1 | 4.367108 | 2.295793 | 0.942931 | 1 | 0.923616 | 1.798540 | 1.927265 |
| 6 | 2.015578 | 1.646319 | 2.253205 | 1 | 2.247341 | 2.836993 | 2.480024 |
| 1 | 1.022146 | 1.197825 | 2.352190 | 1 | 1.642652 | 2.993024 | 0.831123 |
| 1 | 2.392187 | 1.861288 | 3.262612 |   |          |          |          |
| 1 | 1.908070 | 2.601728 | 1.738472 |   |          |          |          |

**B**

|             |                |           |           |
|-------------|----------------|-----------|-----------|
| $E_{gas}$ : | -974.711410356 |           |           |
| $E_{sol}$ : | -974.714571534 |           |           |
| $G_{sol}$ : | -974.215170178 |           |           |
| 6           | -2.168636      | -1.016707 | -0.402462 |
| 6           | -2.188283      | -2.375351 | -0.743981 |
| 6           | -3.260903      | -0.162948 | -0.645565 |
| 6           | -3.264985      | -2.889382 | -1.472957 |
| 6           | -4.326042      | -0.720774 | -1.387649 |
| 6           | -4.331065      | -2.053561 | -1.803319 |
| 1           | -1.371631      | -3.029146 | -0.449834 |
| 1           | -3.273115      | -3.938166 | -1.759972 |
| 1           | -5.183045      | -0.099011 | -1.633306 |
| 1           | -5.179588      | -2.442698 | -2.360403 |
| 14          | -3.461522      | 1.610967  | 0.017374  |
| 6           | -3.853636      | 1.556929  | 1.859839  |
| 1           | -3.996472      | 2.568172  | 2.261181  |
| 1           | -4.773587      | 0.989766  | 2.044613  |
| 1           | -3.045746      | 1.071858  | 2.417133  |
| 6           | -1.912197      | 2.647985  | -0.293211 |
| 1           | -1.038555      | 2.204301  | 0.199687  |
| 1           | -1.698414      | 2.732174  | -1.365457 |
| 1           | -2.037257      | 3.663328  | 0.103951  |
| 46          | -0.327080      | -0.396175 | -0.038017 |
| 6           | 2.912860       | 1.213358  | 1.216946  |
| 15          | 2.149157       | 0.158583  | -0.240277 |
| 6           | 2.336591       | 1.156432  | -1.919527 |
| 6           | 3.131869       | -1.527184 | -0.399290 |
| 35          | -0.788559      | -0.932510 | 2.350981  |
| 6           | -4.899758      | 2.439079  | -0.894747 |
| 1           | -4.759836      | 2.431962  | -1.982147 |
| 1           | -5.863001      | 1.964534  | -0.675069 |
| 1           | -4.978227      | 3.487247  | -0.580552 |
| 6           | 4.666962       | -1.414915 | -0.324082 |
| 1           | 5.009376       | -1.044228 | 0.645083  |
| 1           | 5.104306       | -2.413913 | -0.458206 |
| 1           | 5.083076       | -0.769741 | -1.101877 |
| 6           | 2.749004       | -2.213182 | -1.728758 |
| 1           | 3.168905       | -3.227525 | -1.729079 |
| 1           | 1.663346       | -2.310899 | -1.839960 |
| 1           | 3.145904       | -1.701820 | -2.608513 |
| 6           | 2.636982       | -2.471192 | 0.722832  |
| 1           | 1.548716       | -2.581123 | 0.709424  |
| 1           | 3.083108       | -3.462504 | 0.564598  |
| 1           | 2.919945       | -2.141178 | 1.721913  |
| 6           | 1.312443       | 0.556721  | -2.913796 |
| 1           | 1.536697       | -0.469456 | -3.205470 |
| 1           | 0.294294       | 0.576765  | -2.500092 |
| 1           | 1.299678       | 1.165041  | -3.828320 |
| 6           | 1.909106       | 2.626459  | -1.712846 |
| 1           | 0.916782       | 2.709239  | -1.260027 |
| 1           | 2.616254       | 3.198331  | -1.108653 |
| 1           | 1.860801       | 3.112260  | -2.696694 |
| 6           | 3.738134       | 1.148087  | -2.561255 |
| 1           | 4.500687       | 1.569004  | -1.900102 |
| 1           | 4.062177       | 0.147887  | -2.859383 |
| 1           | 3.719178       | 1.762954  | -3.471832 |
| 6           | 3.106135       | 0.316646  | 2.459735  |
| 1           | 2.192416       | -0.227413 | 2.716630  |
| 1           | 3.928911       | -0.393838 | 2.348861  |
| 1           | 3.354800       | 0.964147  | 3.311033  |
| 6           | 4.252079       | 1.903988  | 0.893698  |
| 1           | 4.601570       | 2.435999  | 1.789147  |
| 1           | 5.033906       | 1.193458  | 0.612481  |
| 1           | 4.164734       | 2.644952  | 0.095384  |

**TS<sub>B-B1</sub>**

|                                                |                |           |           |
|------------------------------------------------|----------------|-----------|-----------|
| $E_{gas}$ :                                    | -974.707863035 |           |           |
| $E_{sol}$ :                                    | -974.711573495 |           |           |
| $G_{sol}$ :                                    | -974.211526460 |           |           |
| imaginary frequency: 60.6489i cm <sup>-1</sup> |                |           |           |
| 6                                              | -1.964569      | -0.282505 | 1.046846  |
| 6                                              | -1.872327      | -0.854208 | 2.319794  |
| 6                                              | -2.994784      | 0.593236  | 0.669910  |
| 6                                              | -2.767013      | -0.449505 | 3.314273  |
| 6                                              | -3.869470      | 0.980479  | 1.712478  |
| 6                                              | -3.761100      | 0.480161  | 3.010063  |
| 1                                              | -1.111797      | -1.596689 | 2.538956  |
| 1                                              | -2.689604      | -0.873152 | 4.312615  |
| 1                                              | -4.668822      | 1.683002  | 1.493616  |
| 1                                              | -4.467113      | 0.797498  | 3.773095  |
| 14                                             | -3.380053      | 1.218626  | -1.090747 |
| 6                                              | -1.835835      | 1.860027  | -1.970171 |
| 1                                              | -2.082039      | 2.180839  | -2.990262 |
| 1                                              | -1.403229      | 2.717832  | -1.442404 |
| 1                                              | -1.069067      | 1.079113  | -2.040898 |
| 6                                              | -4.178922      | -0.161871 | -2.093360 |
| 1                                              | -3.507752      | -1.022174 | -2.179376 |
| 1                                              | -5.103601      | -0.505799 | -1.615272 |
| 1                                              | -4.431756      | 0.185665  | -3.103090 |
| 46                                             | -0.321555      | -0.507005 | -0.009838 |
| 6                                              | 2.876962       | 0.686918  | -1.768706 |
| 15                                             | 2.170379       | 0.293408  | 0.015781  |
| 6                                              | 3.226660       | -1.151311 | 0.814544  |
| 6                                              | 2.326423       | 1.892481  | 1.136633  |
| 35                                             | -1.347870      | -2.593479 | -0.842758 |
| 6                                              | -4.598495      | 2.662481  | -0.955615 |
| 1                                              | -5.572132      | 2.354138  | -0.557920 |
| 1                                              | -4.215759      | 3.472431  | -0.323510 |
| 1                                              | -4.778009      | 3.081410  | -1.953484 |
| 6                                              | 3.661154       | 2.654621  | 1.027452  |
| 1                                              | 3.829539       | 3.068126  | 0.029963  |
| 1                                              | 3.646527       | 3.501973  | 1.726896  |
| 1                                              | 4.521678       | 2.033055  | 1.288597  |
| 6                                              | 2.098028       | 1.506449  | 2.613621  |
| 1                                              | 2.002819       | 2.428410  | 3.202145  |
| 1                                              | 1.172913       | 0.936344  | 2.749660  |
| 1                                              | 2.927734       | 0.938034  | 3.039090  |
| 6                                              | 1.159927       | 2.837233  | 0.763398  |
| 1                                              | 0.191891       | 2.337865  | 0.880947  |
| 1                                              | 1.172726       | 3.700161  | 1.442961  |
| 1                                              | 1.220227       | 3.222978  | -0.254298 |
| 6                                              | 2.412360       | -1.743987 | 1.989218  |
| 1                                              | 2.279590       | -1.051405 | 2.820580  |
| 1                                              | 1.423763       | -2.076959 | 1.656422  |
| 1                                              | 2.948521       | -2.620777 | 2.376376  |
| 6                                              | 3.371950       | -2.295691 | -0.212320 |
| 1                                              | 2.404253       | -2.601872 | -0.623048 |
| 1                                              | 4.044065       | -2.048057 | -1.036782 |
| 1                                              | 3.800011       | -3.166530 | 0.301083  |
| 6                                              | 4.626269       | -0.748206 | 1.317668  |
| 1                                              | 5.251738       | -0.320927 | 0.529773  |
| 1                                              | 4.585197       | -0.033442 | 2.144204  |
| 1                                              | 5.140671       | -1.643288 | 1.693582  |
| 6                                              | 2.313603       | 2.036915  | -2.263498 |
| 1                                              | 1.222481       | 2.079030  | -2.192663 |
| 1                                              | 2.734055       | 2.896899  | -1.736814 |
| 1                                              | 2.575308       | 2.150289  | -3.323615 |
| 6                                              | 4.413594       | 0.727362  | -1.881356 |
| 1                                              | 4.687636       | 1.005694  | -2.908309 |
| 1                                              | 4.865169       | 1.464632  | -1.212291 |
| 1                                              | 4.875048       | -0.242650 | -1.680559 |
| 6                                              | 2.318282       | -0.386963 | -2.733166 |

|                    |                |           |           |                           |                           |           |           |
|--------------------|----------------|-----------|-----------|---------------------------|---------------------------|-----------|-----------|
| 1                  | 1.224555       | -0.426146 | -2.701915 | 1                         | -2.445848                 | -2.538144 | 1.411014  |
| 1                  | 2.616828       | -0.127565 | -3.757820 |                           |                           |           |           |
| 1                  | 2.691590       | -1.390608 | -2.529624 |                           |                           |           |           |
| <b>B1</b>          |                |           |           | <b>TS<sub>B1-B2</sub></b> |                           |           |           |
| E <sub>gas</sub> : | -974.720705642 |           |           | E <sub>gas</sub> :        | -1130.681852480           |           |           |
| E <sub>sol</sub> : | -974.725664146 |           |           | E <sub>sol</sub> :        | -1130.685016050           |           |           |
| G <sub>sol</sub> : | -974.225028504 |           |           | G <sub>sol</sub> :        | -1130.104868570           |           |           |
|                    |                |           |           | imaginary frequency:      | 47.5037i cm <sup>-1</sup> |           |           |
| 6                  | 1.334123       | 0.442958  | -1.063792 | 6                         | -2.321787                 | 0.532703  | -0.661999 |
| 6                  | 1.067081       | 0.642382  | -2.422626 | 6                         | -2.615256                 | 1.488155  | -1.641818 |
| 6                  | 2.369879       | 1.120399  | -0.401352 | 6                         | -3.331952                 | -0.033174 | 0.140402  |
| 6                  | 1.791067       | 1.592259  | -3.147803 | 6                         | -3.908326                 | 2.001152  | -1.758441 |
| 6                  | 3.065961       | 2.085446  | -1.171280 | 6                         | -4.627497                 | 0.521023  | 0.001680  |
| 6                  | 2.786770       | 2.332134  | -2.512662 | 6                         | -4.916343                 | 1.527350  | -0.918194 |
| 1                  | 0.306254       | 0.059821  | -2.926738 | 1                         | -1.837836                 | 1.832738  | -2.316708 |
| 1                  | 1.573820       | 1.741724  | -4.202739 | 1                         | -4.125478                 | 2.755769  | -2.511144 |
| 1                  | 3.872309       | 2.646511  | -0.703780 | 1                         | -5.436524                 | 0.136136  | 0.617519  |
| 1                  | 3.356269       | 3.078423  | -3.060383 | 1                         | -5.928570                 | 1.915559  | -0.999291 |
| 14                 | 3.145276       | 0.826034  | 1.320198  | 14                        | -3.172340                 | -1.581688 | 1.233112  |
| 6                  | 3.458515       | 2.523751  | 2.109478  | 6                         | -1.605804                 | -1.568277 | 2.290132  |
| 1                  | 3.930326       | 2.396099  | 3.091826  | 1                         | -1.476640                 | -2.531385 | 2.799831  |
| 1                  | 4.122206       | 3.158781  | 1.512415  | 1                         | -0.719958                 | -1.401222 | 1.665014  |
| 1                  | 2.522633       | 3.074724  | 2.262308  | 1                         | -1.632744                 | -0.785415 | 3.056181  |
| 6                  | 2.139829       | -0.173835 | 2.560114  | 6                         | -4.652256                 | -1.665400 | 2.413702  |
| 1                  | 1.181289       | 0.299393  | 2.794031  | 1                         | -4.744695                 | -0.763441 | 3.030464  |
| 1                  | 1.952648       | -1.192300 | 2.208861  | 1                         | -5.601768                 | -1.810072 | 1.885946  |
| 1                  | 2.709607       | -0.237921 | 3.496779  | 1                         | -4.529830                 | -2.517267 | 3.094161  |
| 46                 | 0.195192       | -0.924945 | -0.158066 | 46                        | -0.372900                 | 0.239592  | -0.319554 |
| 6                  | -2.571844      | -0.371438 | 1.895395  | 6                         | 2.741112                  | -1.942357 | 0.750891  |
| 15                 | -1.936102      | 0.229741  | 0.135925  | 15                        | 2.290533                  | -0.102840 | 0.212053  |
| 6                  | -3.128212      | -0.538821 | -1.226926 | 6                         | 2.953348                  | 1.085605  | 1.634905  |
| 6                  | -2.051708      | 2.181282  | 0.055508  | 6                         | 3.303225                  | 0.305548  | -1.425491 |
| 35                 | 1.881657       | -2.716429 | -0.465577 | 35                        | -0.603123                 | -1.287472 | -2.290680 |
| 6                  | 4.793244       | -0.046968 | 1.027270  | 6                         | -1.118509                 | 2.758650  | 1.518587  |
| 1                  | 4.619885       | -1.031452 | 0.578990  | 6                         | -0.653240                 | 3.248173  | 0.509241  |
| 1                  | 5.438106       | 0.523048  | 0.348584  | 6                         | -1.777263                 | 2.280441  | 2.733425  |
| 1                  | 5.337040       | -0.189969 | 1.969247  | 1                         | -2.175892                 | 3.125778  | 3.307621  |
| 6                  | -3.356213      | 2.771835  | 0.627925  | 1                         | -1.091805                 | 1.728750  | 3.386647  |
| 1                  | -3.464286      | 2.594781  | 1.700488  | 1                         | -2.613724                 | 1.620117  | 2.479119  |
| 1                  | -3.336162      | 3.860572  | 0.484415  | 1                         | -0.208040                 | 3.975403  | -0.680778 |
| 1                  | -4.250522      | 2.394597  | 0.126619  | 1                         | -1.021683                 | 4.036217  | -1.412513 |
| 6                  | -1.903484      | 2.646900  | -1.409155 | 1                         | 0.088931                  | 4.998567  | -0.419851 |
| 1                  | -1.822398      | 3.741780  | -1.412127 | 1                         | 0.642454                  | 3.492192  | -1.170630 |
| 1                  | -0.997822      | 2.251694  | -1.876604 | 6                         | -3.185781                 | -3.115414 | 0.135575  |
| 1                  | -2.766659      | 2.388416  | -2.026563 | 1                         | -2.363745                 | -3.085843 | -0.587102 |
| 6                  | -0.847701      | 2.770034  | 0.826754  | 1                         | -3.093913                 | -4.030811 | 0.733747  |
| 1                  | 0.102546       | 2.400864  | 0.434545  | 1                         | -4.121894                 | -3.177325 | -0.431785 |
| 1                  | -0.860409      | 3.861173  | 0.702178  | 6                         | 3.162995                  | -0.847060 | -2.444401 |
| 1                  | -0.881229      | 2.567246  | 1.897817  | 1                         | 3.595709                  | -0.511561 | -3.396788 |
| 6                  | -2.414712      | -0.466807 | -2.596359 | 1                         | 3.706696                  | -1.746928 | -2.148881 |
| 1                  | -2.156810      | 0.546617  | -2.904004 | 1                         | 2.117924                  | -1.107054 | -2.629484 |
| 1                  | -1.502301      | -1.070495 | -2.592061 | 6                         | 4.805067                  | 0.597880  | -1.234417 |
| 1                  | -3.085969      | -0.882807 | -3.359530 | 1                         | 5.255347                  | 0.768975  | -2.222011 |
| 6                  | -3.335901      | -2.045326 | -0.952508 | 1                         | 4.993864                  | 1.494471  | -0.639376 |
| 1                  | -2.384903      | -2.576711 | -0.838635 | 1                         | 5.341247                  | -0.235756 | -0.774808 |
| 1                  | -3.960650      | -2.246905 | -0.080367 | 6                         | 2.628106                  | 1.534921  | -2.077572 |
| 1                  | -3.846792      | -2.482494 | -1.820293 | 1                         | 2.716739                  | 2.441663  | -1.475680 |
| 6                  | -4.508577      | 0.138993  | -1.342846 | 1                         | 3.112746                  | 1.735488  | -3.042715 |
| 1                  | -5.058893      | 0.149716  | -0.399347 | 1                         | 1.567512                  | 1.342895  | -2.269708 |
| 1                  | -4.440616      | 1.165711  | -1.711282 | 6                         | 4.228740                  | -2.328265 | 0.609843  |
| 1                  | -5.114125      | -0.421028 | -2.068233 | 1                         | 4.895175                  | -1.680220 | 1.183659  |
| 6                  | -1.940631      | 0.491238  | 3.008325  | 1                         | 4.361147                  | -3.350831 | 0.989921  |
| 1                  | -0.854258      | 0.555886  | 2.911901  | 1                         | 4.565811                  | -2.330299 | -0.428501 |
| 1                  | -2.350331      | 1.502698  | 3.051028  | 6                         | 1.890907                  | -2.912134 | -0.100056 |
| 1                  | -2.154518      | 0.016430  | 3.974733  | 1                         | 2.118027                  | -3.939979 | 0.215553  |
| 6                  | -4.101275      | -0.356577 | 2.088589  | 1                         | 0.820945                  | -2.742780 | 0.040957  |
| 1                  | -4.326653      | -0.664725 | 3.118589  | 1                         | 2.088222                  | -2.842147 | -1.168947 |
| 1                  | -4.533034      | 0.637046  | 1.944348  | 6                         | 2.325289                  | -2.187945 | 2.217971  |
| 1                  | -4.619883      | -1.053498 | 1.427272  | 1                         | 2.966099                  | -1.675430 | 2.938583  |
| 6                  | -2.041310      | -1.810079 | 2.114162  | 1                         | 1.286735                  | -1.905396 | 2.408772  |
| 1                  | -0.945900      | -1.851359 | 2.058900  | 1                         | 2.410946                  | -3.263655 | 2.421685  |
| 1                  | -2.322563      | -2.140637 | 3.123131  | 6                         | 4.346230                  | 0.757006  | 2.207821  |
|                    |                |           |           | 1                         | 4.378333                  | -0.210800 | 2.712481  |

|                    |                |           |           |                          |                            |           |           |
|--------------------|----------------|-----------|-----------|--------------------------|----------------------------|-----------|-----------|
| 1                  | 5.130977       | 0.770749  | 1.448372  | 1                        | -4.009285                  | -0.751427 | 2.055306  |
| 1                  | 4.605748       | 1.517189  | 2.958095  | 1                        | -4.723722                  | -1.380167 | 0.564999  |
| 6                  | 2.974508       | 2.542925  | 1.126371  | 1                        | -4.095404                  | -2.496463 | 1.779526  |
| 1                  | 3.185765       | 3.204862  | 1.977006  | 46                       | 0.966404                   | 0.146698  | -0.125219 |
| 1                  | 3.748184       | 2.724950  | 0.378070  | 35                       | 3.008304                   | -1.099462 | -0.774660 |
| 1                  | 2.006941       | 2.843160  | 0.717583  | 6                        | 0.117475                   | 1.516855  | 1.466938  |
| 6                  | 1.918964       | 1.055207  | 2.783558  | 6                        | 1.382240                   | 1.469170  | 1.354956  |
| 1                  | 1.840001       | 0.084932  | 3.274195  | 6                        | -1.056585                  | 1.949838  | 2.261958  |
| 1                  | 2.217962       | 1.786094  | 3.547587  | 1                        | -1.638178                  | 2.713777  | 1.737018  |
| 1                  | 0.929322       | 1.342194  | 2.420491  | 1                        | -0.701973                  | 2.363824  | 3.213851  |
|                    |                |           |           | 1                        | -1.725543                  | 1.112019  | 2.479201  |
|                    |                |           |           | 6                        | 2.739118                   | 1.851695  | 1.801886  |
|                    |                |           |           | 1                        | 2.669797                   | 2.516899  | 2.672610  |
|                    |                |           |           | 1                        | 3.320060                   | 0.964146  | 2.068116  |
|                    |                |           |           | 1                        | 3.280421                   | 2.370599  | 1.004497  |
|                    |                |           |           | 6                        | -2.116048                  | -2.855571 | -0.847676 |
|                    |                |           |           | 1                        | -1.123094                  | -2.882794 | -1.311437 |
|                    |                |           |           | 1                        | -2.312306                  | -3.847346 | -0.422364 |
|                    |                |           |           | 1                        | -2.849873                  | -2.680879 | -1.642734 |
|                    |                |           |           |                          |                            |           |           |
| <b>B2</b>          |                |           |           | <b>C</b>                 |                            |           |           |
| E <sub>gas</sub> : | -650.653410701 |           |           | E <sub>gas</sub> :       | -650.689730939             |           |           |
| E <sub>sol</sub> : | -650.657844258 |           |           | E <sub>sol</sub> :       | -650.694015144             |           |           |
| G <sub>sol</sub> : | -650.432599557 |           |           | G <sub>sol</sub> :       | -650.462948205             |           |           |
| 6                  | 0.066784       | -0.762382 | -0.814281 | 6                        | -1.155603                  | 1.251601  | 0.499566  |
| 6                  | -0.523457      | -1.448827 | -1.876403 | 6                        | -1.279092                  | 2.629475  | 0.176393  |
| 6                  | 1.433036       | -0.830425 | -0.520116 | 6                        | -1.552545                  | 0.252632  | -0.452008 |
| 6                  | 0.261475       | -2.283454 | -2.675213 | 6                        | -1.738829                  | 3.038098  | -1.060920 |
| 6                  | 2.185912       | -1.696840 | -1.351058 | 6                        | -1.967838                  | 0.729426  | -1.734144 |
| 6                  | 1.622708       | -2.414272 | -2.403493 | 6                        | -2.064146                  | 2.076515  | -2.035276 |
| 1                  | -1.579369      | -1.331355 | -2.096560 | 1                        | -0.978201                  | 3.366137  | 0.916433  |
| 1                  | -0.195089      | -2.821376 | -3.502208 | 1                        | -1.821972                  | 4.096912  | -1.289704 |
| 1                  | 3.254342       | -1.795336 | -1.173787 | 1                        | -2.255443                  | 0.006534  | -2.494059 |
| 1                  | 2.245953       | -3.061619 | -3.014669 | 1                        | -2.401679                  | 2.391237  | -3.018963 |
| 14                 | 2.482576       | 0.191112  | 0.712334  | 14                       | -2.021686                  | -1.585460 | -0.124945 |
| 6                  | 1.555737       | 1.044127  | 2.116383  | 6                        | -1.570433                  | -2.288827 | 1.562966  |
| 1                  | 2.293711       | 1.558339  | 2.746569  | 1                        | -2.022471                  | -3.285458 | 1.649306  |
| 1                  | 0.853022       | 1.796401  | 1.747434  | 1                        | -0.490380                  | -2.399291 | 1.691243  |
| 1                  | 1.014100       | 0.343794  | 2.760247  | 1                        | -1.951964                  | -1.682347 | 2.390507  |
| 6                  | 3.732912       | -0.993339 | 1.507296  | 6                        | -3.909656                  | -1.632133 | -0.283827 |
| 1                  | 3.233695       | -1.802798 | 2.053680  | 1                        | -4.389294                  | -1.019596 | 0.488930  |
| 1                  | 4.407441       | -1.454392 | 0.777557  | 1                        | -4.249230                  | -1.259992 | -1.256969 |
| 1                  | 4.357811       | -0.447896 | 2.225248  | 1                        | -4.281838                  | -2.657873 | -0.172137 |
| 46                 | -1.206425      | 0.271879  | 0.306264  | 6                        | 0.617411                   | 0.240259  | 1.642343  |
| 35                 | -0.714898      | 2.413559  | -0.802257 | 6                        | -0.545806                  | 0.871690  | 1.823576  |
| 6                  | -1.657644      | -1.448516 | 1.666011  | 6                        | 1.642023                   | -0.311193 | 2.572987  |
| 6                  | -2.595168      | -1.353928 | 0.860808  | 1                        | 2.592608                   | 0.220548  | 2.468033  |
| 6                  | -0.765329      | -1.926694 | 2.733287  | 1                        | 1.295557                   | -0.221637 | 3.612045  |
| 1                  | 0.213481       | -2.197013 | 2.323346  | 1                        | 1.844203                   | -1.366440 | 2.363111  |
| 1                  | -1.197240      | -2.814870 | 3.209903  | 6                        | -1.201501                  | 1.262159  | 3.123855  |
| 1                  | -0.612208      | -1.163425 | 3.502690  | 1                        | -0.603007                  | 0.958276  | 3.986858  |
| 6                  | -3.840703      | -1.544138 | 0.100202  | 1                        | -1.346172                  | 2.349111  | 3.181127  |
| 1                  | -4.438795      | -2.338418 | 0.563457  | 1                        | -2.195213                  | 0.803511  | 3.216386  |
| 1                  | -4.441951      | -0.629723 | 0.075048  | 46                       | 0.843237                   | 0.223431  | -0.323634 |
| 1                  | -3.627668      | -1.836929 | -0.933582 | 35                       | 3.197355                   | -0.356459 | -0.628814 |
| 6                  | 3.396251       | 1.496904  | -0.297641 | 6                        | -1.251602                  | -2.658017 | -1.473785 |
| 1                  | 2.680157       | 2.195098  | -0.744294 | 1                        | -0.160147                  | -2.685873 | -1.380092 |
| 1                  | 4.086663       | 2.070772  | 0.332701  | 1                        | -1.622229                  | -3.687558 | -1.395140 |
| 1                  | 3.977782       | 1.044916  | -1.109297 | 1                        | -1.490168                  | -2.301627 | -2.482390 |
|                    |                |           |           |                          |                            |           |           |
|                    |                |           |           | <b>TS<sub>c-cd</sub></b> |                            |           |           |
|                    |                |           |           | E <sub>gas</sub> :       | -650.661240416             |           |           |
|                    |                |           |           | E <sub>sol</sub> :       | -650.665560678             |           |           |
|                    |                |           |           | G <sub>sol</sub> :       | -650.431601262             |           |           |
|                    |                |           |           | imaginary frequency:     | 124.7380i cm <sup>-1</sup> |           |           |
| 6                  | -0.865408      | 1.016396  | -0.411484 | 6                        | 1.462145                   | -1.106837 | 0.612616  |
| 6                  | -0.840821      | 2.219084  | -1.131332 | 6                        | 2.080427                   | -2.363765 | 0.515716  |
| 6                  | -1.990308      | 0.168118  | -0.388461 | 6                        | 1.759894                   | -0.117022 | -0.358194 |
| 6                  | -1.937198      | 2.576160  | -1.917087 | 6                        | 2.943518                   | -2.668746 | -0.535803 |
| 6                  | -3.074806      | 0.569986  | -1.199099 | 6                        | 2.625743                   | -0.449431 | -1.413651 |
| 6                  | -3.058619      | 1.746283  | -1.949318 | 6                        | 3.215211                   | -1.710964 | -1.510327 |
| 1                  | 0.031770       | 2.862907  | -1.085478 | 1                        | 1.859240                   | -3.129304 | 1.252683  |
| 1                  | -1.913287      | 3.497367  | -2.493234 |                          |                            |           |           |
| 1                  | -3.962644      | -0.057115 | -1.243833 |                          |                            |           |           |
| 1                  | -3.923247      | 2.017034  | -2.549321 |                          |                            |           |           |
| 14                 | -2.201552      | -1.521991 | 0.486901  |                          |                            |           |           |
| 6                  | -0.924680      | -1.906000 | 1.820713  |                          |                            |           |           |
| 1                  | -1.187476      | -2.866753 | 2.282471  |                          |                            |           |           |
| 1                  | 0.088606       | -2.001999 | 1.416017  |                          |                            |           |           |
| 1                  | -0.896156      | -1.156758 | 2.618943  |                          |                            |           |           |
| 6                  | -3.916350      | -1.531338 | 1.290077  |                          |                            |           |           |

|    |           |           |           |
|----|-----------|-----------|-----------|
| 1  | 3.391464  | -3.657014 | -0.595918 |
| 1  | 2.858830  | 0.289087  | -2.175535 |
| 1  | 3.881980  | -1.938534 | -2.337686 |
| 14 | 1.156699  | 1.677127  | -0.218182 |
| 6  | -0.643827 | 2.695773  | 0.552869  |
| 1  | -0.238752 | 3.585965  | 0.062970  |
| 1  | -1.731315 | 2.763377  | 0.401451  |
| 1  | -0.444168 | 2.742022  | 1.623509  |
| 6  | 2.234771  | 2.487607  | 1.105201  |
| 1  | 2.074576  | 2.022381  | 2.083777  |
| 1  | 3.287801  | 2.338295  | 0.838234  |
| 1  | 2.055639  | 3.563533  | 1.202642  |
| 6  | -0.632578 | -0.154709 | 1.567923  |
| 6  | 0.498621  | -0.860824 | 1.722720  |
| 6  | -1.753567 | 0.093728  | 2.531897  |
| 1  | -2.615796 | -0.533703 | 2.276365  |
| 1  | -1.455048 | -0.139101 | 3.561691  |
| 1  | -2.093072 | 1.135207  | 2.512997  |
| 6  | 0.822096  | -1.529747 | 3.054696  |
| 1  | 0.301718  | -1.060980 | 3.892241  |
| 1  | 0.535988  | -2.589377 | 3.046472  |
| 1  | 1.897867  | -1.480870 | 3.254066  |
| 46 | -1.097193 | 0.646991  | -0.206950 |
| 35 | -2.275810 | -1.326898 | -1.068588 |
| 6  | 1.390331  | 2.539399  | -1.883445 |
| 1  | 0.839150  | 2.032730  | -2.683314 |
| 1  | 1.057171  | 3.582204  | -1.851794 |
| 1  | 2.450478  | 2.547383  | -2.163322 |

**CD**

|             |                |           |           |
|-------------|----------------|-----------|-----------|
| $E_{gas}$ : | -650.667878525 |           |           |
| $E_{sol}$ : | -650.672491686 |           |           |
| $G_{sol}$ : | -650.439890161 |           |           |
| 6           | -1.908671      | -0.221802 | 0.703787  |
| 6           | -3.058895      | 0.413566  | 1.202904  |
| 6           | -1.709513      | -0.251092 | -0.698004 |
| 6           | -3.976107      | 1.026591  | 0.350694  |
| 6           | -2.641790      | 0.373357  | -1.540905 |
| 6           | -3.773291      | 1.007800  | -1.028580 |
| 1           | -3.230038      | 0.458687  | 2.273363  |
| 1           | -4.845887      | 1.525918  | 0.769245  |
| 1           | -2.487623      | 0.363493  | -2.617219 |
| 1           | -4.484466      | 1.483757  | -1.697992 |
| 14          | -0.219255      | -1.110673 | -1.415829 |
| 6           | 2.447812       | -1.785038 | -0.403039 |
| 1           | 2.709118       | -1.815607 | -1.466465 |
| 1           | 3.346329       | -1.581402 | 0.191542  |
| 1           | 2.003156       | -2.730633 | -0.096124 |
| 6           | -0.402104      | -2.984434 | -1.372303 |
| 1           | -0.531386      | -3.354344 | -0.351114 |
| 1           | -1.300241      | -3.253874 | -1.943032 |
| 1           | 0.449788       | -3.499370 | -1.827018 |
| 6           | 0.393155       | -0.901381 | 1.499004  |
| 6           | -0.943260      | -0.832160 | 1.662506  |
| 6           | 1.396226       | -1.425075 | 2.495342  |
| 1           | 2.284616       | -0.786161 | 2.539729  |
| 1           | 0.973775       | -1.441078 | 3.505161  |
| 1           | 1.735122       | -2.438473 | 2.247420  |
| 6           | -1.561684      | -1.367209 | 2.955932  |
| 1           | -0.964769      | -2.166665 | 3.398063  |
| 1           | -1.672097      | -0.577511 | 3.710727  |
| 1           | -2.557835      | -1.773801 | 2.756469  |
| 46          | 1.375100       | -0.050611 | -0.044119 |
| 35          | 1.164712       | 2.444471  | 0.142949  |
| 6           | 0.200695       | -0.527592 | -3.157272 |
| 1           | 0.271355       | 0.563103  | -3.204994 |
| 1           | 1.151287       | -0.950675 | -3.499370 |
| 1           | -0.575596      | -0.857501 | -3.860926 |

**TS<sub>CD-CD1</sub>**

|             |                |
|-------------|----------------|
| $E_{gas}$ : | -650.669756866 |
| $E_{sol}$ : | -650.672640492 |

|                      |                |                  |           |
|----------------------|----------------|------------------|-----------|
| $G_{sol}$ :          | -650.438104626 |                  |           |
| imaginary frequency: | 23.7068i       | cm <sup>-1</sup> |           |
| 6                    | -2.015045      | 0.334537         | -0.505444 |
| 6                    | -3.131761      | -0.131377        | -1.221843 |
| 6                    | -1.697716      | -0.288254        | 0.727060  |
| 6                    | -3.901717      | -1.194623        | -0.753685 |
| 6                    | -2.481901      | -1.361031        | 1.180681  |
| 6                    | -3.582113      | -1.814498        | 0.453982  |
| 1                    | -3.390792      | 0.321551         | -2.173152 |
| 1                    | -4.747954      | -1.542621        | -1.340048 |
| 1                    | -2.233677      | -1.851894        | 2.118587  |
| 1                    | -4.178428      | -2.643911        | 0.823838  |
| 14                   | -0.237742      | 0.297996         | 1.721464  |
| 6                    | 2.306668       | 1.678731         | 0.993802  |
| 1                    | 2.684135       | 1.201681         | 1.904310  |
| 1                    | 3.135437       | 1.888036         | 0.308820  |
| 1                    | 1.769486       | 2.594551         | 1.234013  |
| 6                    | -0.559272      | 1.938692         | 2.583848  |
| 1                    | -0.848497      | 2.719796         | 1.875133  |
| 1                    | -1.388903      | 1.799664         | 3.289361  |
| 1                    | 0.306702       | 2.287318         | 3.155653  |
| 6                    | 0.124120       | 1.621445         | -0.912238 |
| 6                    | -1.207522      | 1.455645         | -1.066868 |
| 6                    | 0.954413       | 2.715098         | -1.538674 |
| 1                    | 1.923169       | 2.337727         | -1.881183 |
| 1                    | 0.455170       | 3.135177         | -2.417543 |
| 1                    | 1.154913       | 3.534509         | -0.836697 |
| 6                    | -1.990151      | 2.451321         | -1.925512 |
| 1                    | -1.535202      | 3.443283         | -1.922128 |
| 1                    | -2.062064      | 2.122007         | -2.970605 |
| 1                    | -3.009954      | 2.557939         | -1.543667 |
| 46                   | 1.299063       | 0.218197         | -0.055388 |
| 35                   | 1.565514       | -2.083561        | -1.045590 |
| 6                    | 0.384499       | -0.982358        | 2.949417  |
| 1                    | 0.550911       | -1.946853        | 2.461095  |
| 1                    | 1.325650       | -0.665376        | 3.411703  |
| 1                    | -0.346591      | -1.116951        | 3.758359  |

**CD1**

|             |                |           |           |
|-------------|----------------|-----------|-----------|
| $E_{gas}$ : | -650.675503438 |           |           |
| $E_{sol}$ : | -650.680068833 |           |           |
| $G_{sol}$ : | -650.447513395 |           |           |
| 6           | -2.187961      | -0.203658 | -0.493723 |
| 6           | -3.105389      | -0.954460 | -1.248938 |
| 6           | -1.617191      | -0.793004 | 0.666545  |
| 6           | -3.423017      | -2.264353 | -0.893892 |
| 6           | -1.936067      | -2.120531 | 0.996417  |
| 6           | -2.839135      | -2.854637 | 0.229668  |
| 1           | -3.560333      | -0.523818 | -2.135113 |
| 1           | -4.123298      | -2.829822 | -1.502961 |
| 1           | -1.484116      | -2.582597 | 1.870509  |
| 1           | -3.086346      | -3.876244 | 0.504296  |
| 14          | -0.382563      | 0.214623  | 1.640828  |
| 6           | 2.250376       | 1.730867  | 0.479087  |
| 1           | 3.003421       | 1.129464  | 0.985335  |
| 1           | 2.664879       | 2.229628  | -0.400234 |
| 1           | 1.762013       | 2.439587  | 1.147103  |
| 6           | -1.058264      | 1.691673  | 2.595942  |
| 1           | -1.868583      | 2.193861  | 2.062970  |
| 1           | -1.436386      | 1.345923  | 3.566235  |
| 1           | -0.272134      | 2.427812  | 2.800026  |
| 6           | -0.635422      | 1.742877  | -0.557827 |
| 6           | -1.845712      | 1.203153  | -0.856978 |
| 6           | -0.266331      | 3.195187  | -0.694651 |
| 1           | 0.529105       | 3.342229  | -1.435304 |
| 1           | -1.111824      | 3.826607  | -0.986402 |
| 1           | 0.114644       | 3.590277  | 0.254741  |
| 6           | -2.950231      | 1.973284  | -1.562987 |
| 1           | -2.762123      | 3.046918  | -1.596542 |
| 1           | -3.058386      | 1.635712  | -2.602188 |
| 1           | -3.916017      | 1.810357  | -1.070109 |
| 46          | 0.916694       | 0.409178  | -0.317274 |







|    |           |           |           |   |           |           |           |
|----|-----------|-----------|-----------|---|-----------|-----------|-----------|
| 1  | -1.880187 | -1.994131 | 2.872381  | 1 | -3.955538 | 1.398191  | -0.488698 |
| 1  | -3.483139 | -1.724773 | 2.186272  | 6 | -1.005897 | -0.421913 | -2.397433 |
| 6  | -0.249226 | 0.070672  | 2.892997  | 1 | -0.954352 | 0.612051  | -2.738136 |
| 1  | -0.591188 | -0.748101 | 3.527439  | 1 | -0.181146 | -0.972279 | -2.875145 |
| 1  | 0.833866  | -0.032053 | 2.752920  | 1 | -1.916252 | -0.902978 | -2.766761 |
| 1  | -0.406286 | 1.011354  | 3.437413  | 6 | -1.613629 | 0.370637  | 1.280407  |
| 46 | 0.981993  | -0.748535 | -0.580166 | 6 | -0.630561 | 1.262193  | 1.560213  |
| 35 | 3.290222  | -0.757445 | 0.151513  | 6 | -2.546325 | -0.197203 | 2.335448  |
| 6  | -3.952076 | -1.977387 | -0.840899 | 1 | -2.441673 | -1.287627 | 2.404964  |
| 1  | -3.387394 | -2.914030 | -0.917920 | 1 | -2.372957 | 0.213185  | 3.332629  |
| 1  | -4.689989 | -2.099437 | -0.040343 | 1 | -3.599118 | -0.000307 | 2.088923  |
| 1  | -4.506790 | -1.853669 | -1.779192 | 6 | -0.364305 | 1.825354  | 2.945731  |

**F1**

E<sub>gas</sub>: -650.670820628  
E<sub>sol</sub>: -650.674381645  
G<sub>sol</sub>: -650.445211017

|    |           |           |           |
|----|-----------|-----------|-----------|
| 6  | -0.404984 | 1.281057  | 0.735091  |
| 6  | -0.840584 | 2.598971  | 0.966160  |
| 6  | 0.607128  | 1.105821  | -0.213405 |
| 6  | -0.283980 | 3.676204  | 0.276108  |
| 6  | 1.205097  | 2.165924  | -0.892544 |
| 6  | 0.739163  | 3.462710  | -0.650018 |
| 1  | -1.625839 | 2.766890  | 1.699803  |
| 1  | -0.640241 | 4.683906  | 0.471375  |
| 1  | 2.016635  | 1.991025  | -1.590584 |
| 1  | 1.188015  | 4.300291  | -1.177171 |
| 14 | -2.831608 | -0.472193 | -0.532703 |
| 6  | -3.780396 | 1.154172  | -0.688899 |
| 1  | -3.115946 | 2.021734  | -0.634259 |
| 1  | -4.315868 | 1.196198  | -1.645470 |
| 1  | -4.524898 | 1.250077  | 0.110268  |
| 6  | -1.580880 | -0.620308 | -1.962400 |
| 1  | -1.060107 | 0.320325  | -2.163442 |
| 1  | -0.842689 | -1.420299 | -1.737691 |
| 1  | -2.056350 | -0.935036 | -2.899999 |
| 6  | -1.954187 | -0.657803 | 1.152346  |
| 6  | -0.937153 | 0.139411  | 1.563137  |
| 6  | -2.502958 | -1.779042 | 2.021093  |
| 1  | -2.416831 | -2.750568 | 1.517495  |
| 1  | -2.003175 | -1.869841 | 2.987524  |
| 1  | -3.573141 | -1.633760 | 2.220081  |
| 6  | -0.197711 | 0.045576  | 2.884630  |
| 1  | -0.553301 | -0.753458 | 3.536691  |
| 1  | 0.871767  | -0.115083 | 2.698277  |
| 1  | -0.281606 | 0.994878  | 3.430029  |
| 46 | 1.017603  | -0.734679 | -0.719207 |
| 35 | 3.220455  | -0.776188 | 0.271083  |
| 6  | -4.063059 | -1.891762 | -0.748936 |
| 1  | -3.573128 | -2.872220 | -0.742051 |
| 1  | -4.832584 | -1.899154 | 0.031010  |
| 1  | -4.576819 | -1.788972 | -1.712627 |

**TS<sub>F1-G</sub>**

E<sub>gas</sub>: -650.656251744  
E<sub>sol</sub>: -650.660338999  
G<sub>sol</sub>: -650.428340255

imaginary frequency: 144.2165i cm<sup>-1</sup>

|    |           |           |           |
|----|-----------|-----------|-----------|
| 6  | 0.288348  | 1.776105  | 0.504464  |
| 6  | 0.706979  | 3.124839  | 0.519109  |
| 6  | 0.811524  | 0.976789  | -0.522226 |
| 6  | 1.581277  | 3.635868  | -0.435941 |
| 6  | 1.691120  | 1.463736  | -1.485319 |
| 6  | 2.080058  | 2.806283  | -1.440696 |
| 1  | 0.327939  | 3.781559  | 1.296713  |
| 1  | 1.875769  | 4.680735  | -0.392644 |
| 1  | 2.096323  | 0.807399  | -2.249053 |
| 1  | 2.776777  | 3.188835  | -2.181643 |
| 14 | -2.062610 | -0.195783 | -0.484349 |
| 6  | -3.142063 | 1.185940  | -1.193165 |
| 1  | -2.564914 | 2.109218  | -1.314549 |
| 1  | -3.588500 | 0.928280  | -2.159511 |

**G**

E<sub>gas</sub>: -650.676949110  
E<sub>sol</sub>: -650.681288751  
G<sub>sol</sub>: -650.449894641

|    |           |           |           |
|----|-----------|-----------|-----------|
| 6  | -2.133107 | 0.309953  | -0.591704 |
| 6  | -3.503629 | 0.201671  | -0.895614 |
| 6  | -1.450273 | -0.821750 | -0.080514 |
| 6  | -4.196479 | -0.982700 | -0.658179 |
| 6  | -2.162422 | -1.998272 | 0.171410  |
| 6  | -3.526470 | -2.083684 | -0.119866 |
| 1  | -4.035474 | 1.060882  | -1.295118 |
| 1  | -5.256826 | -1.044732 | -0.887147 |
| 1  | -1.655902 | -2.872762 | 0.567885  |
| 1  | -4.060024 | -3.013547 | 0.060352  |
| 14 | -0.008335 | 0.847357  | 1.527158  |
| 6  | -1.357237 | 0.490080  | 2.790376  |
| 1  | -2.354190 | 0.470452  | 2.345589  |
| 1  | -1.183826 | -0.474195 | 3.281615  |
| 1  | -1.329691 | 1.263770  | 3.568429  |
| 6  | 0.929766  | -2.372422 | 0.881976  |
| 1  | 0.219966  | -2.466135 | 1.704145  |
| 1  | 0.798122  | -3.165843 | 0.141590  |
| 1  | 1.961958  | -2.315862 | 1.224119  |
| 6  | -0.429863 | 1.982484  | 0.095771  |
| 6  | -1.419512 | 1.601766  | -0.771080 |
| 6  | 0.350695  | 3.269591  | -0.104499 |
| 1  | 0.838418  | 3.300047  | -1.086764 |
| 1  | -0.306575 | 4.146979  | -0.036918 |
| 1  | 1.136194  | 3.395305  | 0.645083  |
| 6  | -1.861552 | 2.489431  | -1.914305 |
| 1  | -1.031755 | 3.090203  | -2.295990 |
| 1  | -2.268035 | 1.901233  | -2.741934 |
| 1  | -2.643264 | 3.192189  | -1.591954 |
| 46 | 0.583161  | -0.662231 | -0.171423 |
| 35 | 2.968233  | -0.350890 | -0.926908 |
| 6  | 1.574953  | 1.292723  | 2.435817  |
| 1  | 2.411919  | 1.428601  | 1.746468  |
| 1  | 1.429322  | 2.212700  | 3.018975  |
| 1  | 1.843555  | 0.498246  | 3.141059  |

**TS<sub>G-D</sub>**

E<sub>gas</sub>: -650.676019848  
E<sub>sol</sub>: -650.680554768  
G<sub>sol</sub>: -650.448321920

imaginary frequency: 71.9287i cm<sup>-1</sup>

|   |           |           |           |
|---|-----------|-----------|-----------|
| 6 | -2.025302 | 0.260025  | -0.763240 |
| 6 | -3.304665 | 0.020731  | -1.292630 |
| 6 | -1.392212 | -0.751828 | 0.006708  |
| 6 | -3.969372 | -1.173922 | -1.021903 |
| 6 | -2.087393 | -1.933284 | 0.294738  |

|                                                |                 |           |           |   |           |           |          |
|------------------------------------------------|-----------------|-----------|-----------|---|-----------|-----------|----------|
| 6                                              | -3.367568       | -2.147109 | -0.218360 | 1 | -2.325892 | 1.597481  | 2.493922 |
| 1                                              | -3.793109       | 0.779521  | -1.897034 | 1 | -1.827577 | 0.466967  | 3.749379 |
| 1                                              | -4.962561       | -1.342330 | -1.429291 | 6 | -3.285100 | -0.892789 | 1.857655 |
| 1                                              | -1.619403       | -2.711282 | 0.890302  | 1 | -3.560094 | -1.051073 | 2.909762 |
| 1                                              | -3.886957       | -3.078521 | -0.008644 | 1 | -3.977101 | -0.151874 | 1.449477 |
| 14                                             | -0.407744       | 0.763768  | 1.541443  | 1 | -3.456070 | -1.839475 | 1.339173 |
| 6                                              | -1.944337       | 0.632354  | 2.629636  | 6 | -0.909786 | -1.545389 | 2.375677 |
| 1                                              | -2.871360       | 0.695393  | 2.055199  | 1 | 0.138615  | -1.228771 | 2.377323 |
| 1                                              | -1.949530       | -0.315404 | 3.180417  | 1 | -1.211608 | -1.732618 | 3.415360 |
| 1                                              | -1.927973       | 1.442498  | 3.369643  | 1 | -0.979596 | -2.493993 | 1.841614 |
| 6                                              | 1.071862        | -2.375618 | 0.812204  |   |           |           |          |
| 1                                              | 0.447579        | -2.472896 | 1.702366  |   |           |           |          |
| 1                                              | 0.826569        | -3.131374 | 0.062338  |   |           |           |          |
| 1                                              | 2.133423        | -2.378082 | 1.052856  |   |           |           |          |
| 6                                              | -0.504476       | 1.966323  | 0.095058  |   |           |           |          |
| 6                                              | -1.331547       | 1.566054  | -0.920265 |   |           |           |          |
| 6                                              | 0.323747        | 3.228992  | 0.102117  |   |           |           |          |
| 1                                              | 1.375559        | 2.996713  | 0.307798  |   |           |           |          |
| 1                                              | 0.289423        | 3.775128  | -0.844462 |   |           |           |          |
| 1                                              | -0.011100       | 3.915023  | 0.892064  |   |           |           |          |
| 6                                              | -1.637562       | 2.371633  | -2.159894 |   |           |           |          |
| 1                                              | -0.928525       | 3.186828  | -2.311688 |   |           |           |          |
| 1                                              | -1.622515       | 1.733727  | -3.050683 |   |           |           |          |
| 1                                              | -2.639688       | 2.817627  | -2.099282 |   |           |           |          |
| 46                                             | 0.679356        | -0.593642 | -0.097546 |   |           |           |          |
| 35                                             | 3.036730        | -0.256335 | -0.841243 |   |           |           |          |
| 6                                              | 1.050710        | 1.056837  | 2.703981  |   |           |           |          |
| 1                                              | 1.991173        | 1.190859  | 2.163607  |   |           |           |          |
| 1                                              | 0.857915        | 1.947267  | 3.318677  |   |           |           |          |
| 1                                              | 1.172232        | 0.208687  | 3.387334  |   |           |           |          |
| <b>TS<sub>D-A</sub></b>                        |                 |           |           |   |           |           |          |
| E <sub>gas</sub> :                             | -659.878333079  |           |           |   |           |           |          |
| E <sub>sol</sub> :                             | -659.880350714  |           |           |   |           |           |          |
| G <sub>sol</sub> :                             | -659.525203635  |           |           |   |           |           |          |
| imaginary frequency: 297.18 i cm <sup>-1</sup> |                 |           |           |   |           |           |          |
| 6                                              | 2.808395        | -1.816516 | -0.000393 |   |           |           |          |
| 1                                              | 2.100379        | -2.073723 | 0.782959  |   |           |           |          |
| 1                                              | 2.481244        | -2.052408 | -1.007930 |   |           |           |          |
| 1                                              | 3.807132        | -2.175399 | 0.217317  |   |           |           |          |
| 46                                             | 1.210585        | 0.146924  | 0.003882  |   |           |           |          |
| 6                                              | -1.814638       | -0.436833 | 1.787049  |   |           |           |          |
| 15                                             | -1.131451       | 0.008237  | -0.000901 |   |           |           |          |
| 6                                              | -1.787393       | -1.347329 | -1.262087 |   |           |           |          |
| 6                                              | -1.879736       | 1.747260  | -0.527648 |   |           |           |          |
| 35                                             | 3.674373        | 0.340409  | -0.002788 |   |           |           |          |
| 6                                              | -3.373229       | 1.963879  | -0.216543 |   |           |           |          |
| 1                                              | -3.581059       | 1.971479  | 0.856786  |   |           |           |          |
| 1                                              | -3.680971       | 2.943527  | -0.608027 |   |           |           |          |
| 1                                              | -4.016097       | 1.212103  | -0.681817 |   |           |           |          |
| 6                                              | -1.653269       | 1.950291  | -2.041361 |   |           |           |          |
| 1                                              | -1.868690       | 2.997999  | -2.289959 |   |           |           |          |
| 1                                              | -0.614101       | 1.751490  | -2.323572 |   |           |           |          |
| 1                                              | -2.310225       | 1.333814  | -2.659756 |   |           |           |          |
| 6                                              | -1.048662       | 2.848605  | 0.173004  |   |           |           |          |
| 1                                              | 0.018151        | 2.739901  | -0.050544 |   |           |           |          |
| 1                                              | -1.377601       | 3.828169  | -0.200511 |   |           |           |          |
| 1                                              | -1.165455       | 2.856879  | 1.256923  |   |           |           |          |
| 6                                              | -0.935408       | -1.251049 | -2.550142 |   |           |           |          |
| 1                                              | -1.113094       | -0.338122 | -3.118814 |   |           |           |          |
| 1                                              | 0.134292        | -1.298246 | -2.320989 |   |           |           |          |
| 1                                              | -1.186416       | -2.098010 | -3.203284 |   |           |           |          |
| 6                                              | -1.512331       | -2.750687 | -0.680254 |   |           |           |          |
| 1                                              | -0.470986       | -2.858745 | -0.359759 |   |           |           |          |
| 1                                              | -2.163707       | -3.001596 | 0.159810  |   |           |           |          |
| 1                                              | -1.696180       | -3.497464 | -1.464057 |   |           |           |          |
| 6                                              | -3.279275       | -1.256640 | -1.639183 |   |           |           |          |
| 1                                              | -3.940101       | -1.322014 | -0.771145 |   |           |           |          |
| 1                                              | -3.518507       | -0.337251 | -2.179432 |   |           |           |          |
| 1                                              | -3.531273       | -2.093501 | -2.305581 |   |           |           |          |
| 6                                              | -1.632309       | 0.783315  | 2.715972  |   |           |           |          |
| 1                                              | -0.609170       | 1.171380  | 2.677426  |   |           |           |          |
| <b>C1</b>                                      |                 |           |           |   |           |           |          |
| E <sub>gas</sub> :                             | -1130.733700380 |           |           |   |           |           |          |
| E <sub>sol</sub> :                             | -1130.736540810 |           |           |   |           |           |          |
| G <sub>sol</sub> :                             | -1130.154920430 |           |           |   |           |           |          |
| 6                                              | -2.533569       | -0.730664 | 0.838615  |   |           |           |          |
| 6                                              | -1.885199       | -1.153492 | 2.015506  |   |           |           |          |
| 6                                              | -3.235702       | 0.507905  | 0.828078  |   |           |           |          |
| 6                                              | -1.915700       | -0.387523 | 3.180970  |   |           |           |          |
| 6                                              | -3.247580       | 1.252035  | 2.025412  |   |           |           |          |
| 6                                              | -2.606716       | 0.822623  | 3.188198  |   |           |           |          |
| 1                                              | -1.356999       | -2.101649 | 2.003619  |   |           |           |          |
| 1                                              | -1.410436       | -0.743095 | 4.075206  |   |           |           |          |
| 1                                              | -3.769459       | 2.205086  | 2.055298  |   |           |           |          |
| 1                                              | -2.650072       | 1.429722  | 4.089063  |   |           |           |          |
| 14                                             | -4.166898       | 1.309631  | -0.633861 |   |           |           |          |
| 6                                              | -3.429156       | 0.907474  | -2.328265 |   |           |           |          |
| 1                                              | -3.974389       | 1.463743  | -3.101326 |   |           |           |          |
| 1                                              | -2.379146       | 1.217565  | -2.379253 |   |           |           |          |
| 1                                              | -3.471782       | -0.153724 | -2.585574 |   |           |           |          |
| 6                                              | -6.009034       | 0.864245  | -0.585621 |   |           |           |          |
| 1                                              | -6.207402       | -0.197209 | -0.764737 |   |           |           |          |
| 1                                              | -6.438054       | 1.116964  | 0.391348  |   |           |           |          |
| 1                                              | -6.556680       | 1.436178  | -1.345151 |   |           |           |          |
| 46                                             | 0.243653        | -0.895919 | -0.382537 |   |           |           |          |
| 6                                              | 3.408517        | 0.488561  | 1.327734  |   |           |           |          |
| 15                                             | 2.118969        | 0.837497  | -0.103323 |   |           |           |          |
| 6                                              | 1.286165        | 2.580111  | 0.223330  |   |           |           |          |
| 6                                              | 3.074273        | 0.912295  | -1.811687 |   |           |           |          |
| 35                                             | 1.227125        | -3.050455 | 0.471836  |   |           |           |          |
| 6                                              | -2.491444       | -1.671836 | -0.338605 |   |           |           |          |
| 6                                              | -1.326633       | -1.999387 | -0.923421 |   |           |           |          |
| 6                                              | -3.819657       | -2.307659 | -0.714215 |   |           |           |          |
| 1                                              | -3.731003       | -2.997244 | -1.556782 |   |           |           |          |
| 1                                              | -4.583459       | -1.565692 | -0.965321 |   |           |           |          |
| 1                                              | -4.203016       | -2.874570 | 0.145612  |   |           |           |          |
| 6                                              | -1.076938       | -2.971717 | -2.041457 |   |           |           |          |
| 1                                              | -0.326431       | -2.589459 | -2.743326 |   |           |           |          |
| 1                                              | -0.689533       | -3.918037 | -1.649145 |   |           |           |          |
| 1                                              | -1.989583       | -3.172956 | -2.617377 |   |           |           |          |
| 6                                              | -4.072779       | 3.193856  | -0.441422 |   |           |           |          |
| 1                                              | -3.039249       | 3.546675  | -0.353733 |   |           |           |          |
| 1                                              | -4.512706       | 3.673724  | -1.324548 |   |           |           |          |
| 1                                              | -4.626395       | 3.559548  | 0.430675  |   |           |           |          |
| 6                                              | 2.149148        | 1.512232  | -2.892810 |   |           |           |          |
| 1                                              | 1.969366        | 2.581859  | -2.763509 |   |           |           |          |
| 1                                              | 2.628680        | 1.382225  | -3.871805 |   |           |           |          |
| 1                                              | 1.183119        | 0.996613  | -2.935195 |   |           |           |          |
| 6                                              | 3.351585        | -0.543238 | -2.260134 |   |           |           |          |
| 1                                              | 4.031434        | -1.081207 | -1.599926 |   |           |           |          |
| 1                                              | 2.426517        | -1.124893 | -2.325854 |   |           |           |          |
| 1                                              | 3.809257        | -0.519419 | -3.258673 |   |           |           |          |
| 6                                              | 4.398473        | 1.701450  | -1.807097 |   |           |           |          |



|    |           |           |           |    |           |           |           |
|----|-----------|-----------|-----------|----|-----------|-----------|-----------|
| 15 | -2.558217 | 0.130681  | -0.087518 | 1  | -1.872244 | -0.615133 | -3.506698 |
| 6  | -3.213766 | -1.690230 | -0.454617 | 1  | -3.152124 | 0.610830  | -3.523024 |
| 6  | -2.978785 | 1.242462  | -1.658690 | 1  | -1.466873 | 1.094056  | -3.402326 |
| 35 | 0.899379  | -1.147177 | -1.880165 | 6  | -4.393873 | -1.123164 | -1.775697 |
| 6  | 0.773346  | 2.978551  | 0.548754  | 1  | -4.428228 | -0.809265 | -2.819797 |
| 1  | 0.453074  | 2.915533  | -0.495137 | 1  | -4.168425 | -2.199273 | -1.770728 |
| 1  | -0.113273 | 3.092193  | 1.179487  | 1  | -5.389550 | -0.988943 | -1.339706 |
| 1  | 1.379375  | 3.887222  | 0.667777  | 46 | -0.287740 | 0.259137  | -0.757860 |
| 6  | -1.890294 | 0.990783  | -2.724916 | 6  | 3.434690  | 1.643475  | 0.093285  |
| 1  | -0.890688 | 1.225798  | -2.351829 | 15 | 2.313044  | 0.004052  | 0.191202  |
| 1  | -1.859491 | -0.037400 | -3.082027 | 6  | 3.212035  | -1.356387 | -0.926753 |
| 1  | -2.095255 | 1.639651  | -3.588112 | 6  | 2.372500  | -0.587885 | 2.068148  |
| 6  | -4.363384 | 1.004833  | -2.296917 | 35 | -0.739652 | -2.330623 | -0.454556 |
| 1  | -4.492481 | 1.716194  | -3.124853 | 6  | -1.018270 | 3.071049  | 1.078492  |
| 1  | -4.462041 | 0.003767  | -2.721493 | 1  | -0.293697 | 2.574951  | 1.727925  |
| 1  | -5.190168 | 1.162552  | -1.601058 | 1  | -0.491475 | 3.810138  | 0.467907  |
| 6  | -2.869985 | 2.738092  | -1.289347 | 1  | -1.723514 | 3.621476  | 1.717510  |
| 1  | -3.701886 | 3.093781  | -0.677017 | 6  | 1.259178  | -1.627152 | 2.309552  |
| 1  | -1.932249 | 2.968090  | -0.774903 | 1  | 0.264963  | -1.215265 | 2.123355  |
| 1  | -2.884051 | 3.323138  | -2.218333 | 1  | 1.355162  | -2.517660 | 1.690906  |
| 6  | -2.772240 | -2.152537 | -1.861170 | 1  | 1.309220  | -1.938503 | 3.362390  |
| 1  | -1.699684 | -2.019211 | -2.023731 | 6  | 3.719334  | -1.204067 | 2.504798  |
| 1  | -2.990457 | -3.225919 | -1.948786 | 1  | 3.662158  | -1.428579 | 3.578888  |
| 1  | -3.317687 | -1.652084 | -2.664496 | 1  | 3.934662  | -2.145424 | 1.996059  |
| 6  | -2.496823 | -2.629156 | 0.543912  | 1  | 4.569280  | -0.535910 | 2.358997  |
| 1  | -2.718021 | -2.406533 | 1.589667  | 6  | 2.063166  | 0.602230  | 3.000668  |
| 1  | -2.814381 | -3.663230 | 0.352702  | 1  | 2.895277  | 1.303659  | 3.086830  |
| 1  | -1.410844 | -2.591726 | 0.402575  | 1  | 1.168844  | 1.151398  | 2.690345  |
| 6  | -4.737948 | -1.898890 | -0.343737 | 1  | 1.869249  | 0.208544  | 4.006766  |
| 1  | -5.297855 | -1.254465 | -1.026196 | 6  | 2.816742  | -2.791319 | -0.514723 |
| 1  | -4.969060 | -2.938300 | -0.615641 | 1  | 1.736341  | -2.929586 | -0.464668 |
| 1  | -5.122911 | -1.742211 | 0.666582  | 1  | 3.204307  | -3.474507 | -1.283052 |
| 6  | -2.921917 | 2.099754  | 1.960493  | 1  | 3.263639  | -3.096537 | 0.434112  |
| 1  | -3.444470 | 2.434975  | 2.866782  | 6  | 2.683880  | -1.143216 | -2.364787 |
| 1  | -1.886578 | 1.887781  | 2.236841  | 1  | 2.894260  | -0.145379 | -2.757420 |
| 1  | -2.919605 | 2.935484  | 1.260816  | 1  | 3.168324  | -1.868857 | -3.032096 |
| 6  | -5.095068 | 1.231372  | 1.080144  | 1  | 1.604403  | -1.317948 | -2.412437 |
| 1  | -5.681162 | 0.396248  | 0.690716  | 6  | 4.754496  | -1.307516 | -0.930740 |
| 1  | -5.585891 | 1.570656  | 2.003599  | 1  | 5.179016  | -1.459812 | 0.065403  |
| 1  | -5.159011 | 2.055259  | 0.366412  | 1  | 5.115696  | -2.130214 | -1.562436 |
| 6  | -3.672416 | -0.174351 | 2.571070  | 1  | 5.167697  | -0.386907 | -1.345466 |
| 1  | -4.136588 | 0.308354  | 3.441943  | 6  | 2.669203  | 2.835532  | 0.718862  |
| 1  | -4.265844 | -1.062018 | 2.345000  | 1  | 3.128517  | 3.770465  | 0.371291  |
| 1  | -2.672944 | -0.493865 | 2.872875  | 1  | 1.617037  | 2.860411  | 0.444008  |
|    |           |           |           | 1  | 2.723349  | 2.842005  | 1.807981  |
|    |           |           |           | 6  | 4.803769  | 1.577953  | 0.807158  |
|    |           |           |           | 1  | 5.444236  | 0.769066  | 0.454950  |
|    |           |           |           | 1  | 5.334382  | 2.521207  | 0.614252  |
|    |           |           |           | 1  | 4.704054  | 1.491262  | 1.891418  |
|    |           |           |           | 6  | 3.695118  | 1.995399  | -1.391160 |
|    |           |           |           | 1  | 4.205510  | 2.966990  | -1.430018 |
|    |           |           |           | 1  | 4.343960  | 1.276049  | -1.892440 |
|    |           |           |           | 1  | 2.776804  | 2.087087  | -1.971944 |

### TS<sub>Ca-D</sub>

E<sub>gas</sub>: -1130.69328562

E<sub>sol</sub>: -1130.69653353

G<sub>sol</sub>: -1130.10793691

imaginary frequency: 96.2764i cm<sup>-1</sup>

|    |           |           |           |
|----|-----------|-----------|-----------|
| 6  | -3.525048 | -0.376103 | 0.489298  |
| 6  | -4.260914 | -1.335314 | 1.200698  |
| 6  | -2.962916 | 0.722964  | 1.171131  |
| 6  | -4.400974 | -1.218464 | 2.582720  |
| 6  | -3.103416 | 0.821984  | 2.560068  |
| 6  | -3.825293 | -0.142611 | 3.266489  |
| 1  | -4.691440 | -2.189130 | 0.686976  |
| 1  | -4.955417 | -1.974828 | 3.132268  |
| 1  | -2.666028 | 1.660973  | 3.096618  |
| 1  | -3.944605 | -0.055402 | 4.343379  |
| 14 | -2.047046 | 1.872568  | 0.024960  |
| 6  | 0.180944  | 2.013333  | -1.799570 |
| 1  | 0.834183  | 2.685254  | -1.252016 |
| 1  | 0.711409  | 1.579107  | -2.654211 |
| 1  | -0.673621 | 2.577330  | -2.177390 |
| 6  | -3.197064 | 3.021125  | -0.959192 |
| 1  | -4.124363 | 2.507593  | -1.227098 |
| 1  | -3.444690 | 3.896472  | -0.345930 |
| 1  | -2.738360 | 3.390242  | -1.882959 |
| 6  | -2.271929 | 0.224594  | -1.565454 |
| 6  | -3.331349 | -0.403900 | -0.973050 |
| 6  | -2.186414 | 0.344337  | -3.074087 |

### TS<sub>C1-Cb</sub>

E<sub>gas</sub>: -1130.71220588

E<sub>sol</sub>: -1130.71162241

G<sub>sol</sub>: -1130.13173953

imaginary frequency: 97.8900i cm<sup>-1</sup>

|    |           |          |           |
|----|-----------|----------|-----------|
| 6  | -1.840090 | 1.946475 | 0.901362  |
| 6  | -1.332824 | 3.243815 | 1.032040  |
| 6  | -1.879779 | 1.335797 | -0.384075 |
| 6  | -0.831763 | 3.918359 | -0.085365 |
| 6  | -1.305035 | 1.998517 | -1.477662 |
| 6  | -0.798136 | 3.294637 | -1.334298 |
| 1  | -1.296147 | 3.720583 | 2.007291  |
| 1  | -0.446717 | 4.928452 | 0.026128  |
| 1  | -1.269951 | 1.518795 | -2.451370 |
| 1  | -0.383035 | 3.812591 | -2.194420 |
| 14 | -3.885298 | 0.487251 | -0.995270 |
| 6  | -4.766163 | 2.110329 | -0.602862 |
| 1  | -4.261213 | 2.974463 | -1.044400 |

|                    |                |           |           |                           |           |           |           |
|--------------------|----------------|-----------|-----------|---------------------------|-----------|-----------|-----------|
| 1                  | -5.789544      | 2.065315  | -0.998163 | 6                         | -1.722931 | 3.242543  | -2.158488 |
| 1                  | -4.836387      | 2.272601  | 0.477881  | 1                         | -2.410179 | 4.281958  | 1.011043  |
| 6                  | -3.708578      | 0.251828  | -2.861918 | 1                         | -2.327506 | 5.130244  | -1.315882 |
| 1                  | -4.696244      | -0.006873 | -3.265186 | 1                         | -1.126564 | 1.244179  | -2.724634 |
| 1                  | -3.366690      | 1.156531  | -3.373156 | 1                         | -1.691772 | 3.615953  | -3.179003 |
| 1                  | -3.031737      | -0.569735 | -3.123174 | 14                        | -3.332987 | -0.909746 | -0.472540 |
| 6                  | -2.387038      | -0.220014 | 1.731751  | 6                         | -4.520948 | 0.552942  | -0.386078 |
| 6                  | -2.268833      | 1.095275  | 2.017350  | 1                         | -4.301695 | 1.324733  | -1.127903 |
| 6                  | -2.737276      | -1.373008 | 2.616515  | 1                         | -5.530888 | 0.166126  | -0.583267 |
| 1                  | -3.469032      | -2.034356 | 2.143654  | 1                         | -4.533575 | 1.020300  | 0.602638  |
| 1                  | -1.853272      | -1.983347 | 2.830565  | 6                         | -3.266653 | -1.542344 | -2.248740 |
| 1                  | -3.155775      | -1.016564 | 3.567102  | 1                         | -4.287255 | -1.785831 | -2.576712 |
| 6                  | -2.495622      | 1.699686  | 3.384541  | 1                         | -2.873516 | -0.784440 | -2.935059 |
| 1                  | -2.918185      | 0.982775  | 4.090939  | 1                         | -2.649509 | -2.440925 | -2.326898 |
| 1                  | -1.551816      | 2.064451  | 3.810863  | 6                         | -1.510248 | 0.298427  | 1.747877  |
| 1                  | -3.176888      | 2.557838  | 3.323447  | 6                         | -1.835550 | 1.609519  | 1.774859  |
| 46                 | -1.857694      | -0.727847 | -0.137974 | 6                         | -1.335900 | -0.690174 | 2.856168  |
| 15                 | 3.054749       | 0.097518  | -0.020072 | 1                         | -1.955481 | -1.580032 | 2.710061  |
| 6                  | 3.956038       | 1.346834  | 1.198606  | 1                         | -0.297749 | -1.035741 | 2.918761  |
| 35                 | -1.158227      | -3.114346 | -0.101499 | 1                         | -1.599631 | -0.238531 | 3.821536  |
| 6                  | 3.659484       | 0.520231  | -1.839375 | 6                         | -2.165957 | 2.391899  | 3.023593  |
| 6                  | 3.698321       | -1.706073 | 0.404365  | 1                         | -2.144590 | 1.775720  | 3.924590  |
| 6                  | -5.030729      | -0.874579 | -0.337911 | 1                         | -1.455804 | 3.217383  | 3.163330  |
| 1                  | -5.181309      | -0.787802 | 0.742768  | 1                         | -3.165843 | 2.838877  | 2.946241  |
| 1                  | -6.011366      | -0.754891 | -0.821067 | 46                        | -0.977433 | -0.466479 | -0.054299 |
| 1                  | -4.662900      | -1.881860 | -0.554034 | 15                        | 2.261036  | 0.136954  | -0.026520 |
| 6                  | 3.325004       | -2.668436 | -0.745674 | 6                         | 2.811069  | 1.742903  | 0.962238  |
| 1                  | 3.928177       | -2.519729 | -1.644988 | 35                        | -0.522201 | -3.013996 | -0.099386 |
| 1                  | 3.501581       | -3.698858 | -0.408506 | 6                         | 2.802348  | 0.376028  | -1.895854 |
| 1                  | 2.265297       | -2.594926 | -1.011842 | 6                         | 3.297539  | -1.367406 | 0.697899  |
| 6                  | 2.871532       | -2.190928 | 1.621810  | 6                         | -3.981405 | -2.216974 | 0.716967  |
| 1                  | 3.068120       | -1.624525 | 2.533099  | 1                         | -4.104574 | -1.814909 | 1.728455  |
| 1                  | 1.797864       | -2.145403 | 1.412271  | 1                         | -4.974220 | -2.535893 | 0.369327  |
| 1                  | 3.125192       | -3.239897 | 1.829322  | 1                         | -3.326980 | -3.089931 | 0.758991  |
| 6                  | 5.199770       | -1.866439 | 0.709276  | 6                         | 3.248544  | -2.563839 | -0.279647 |
| 1                  | 5.832050       | -1.541605 | -0.121782 | 1                         | 3.839034  | -2.401676 | -1.183873 |
| 1                  | 5.506262       | -1.313963 | 1.601758  | 1                         | 3.677462  | -3.437755 | 0.229497  |
| 1                  | 5.422735       | -2.926929 | 0.897207  | 1                         | 2.223821  | -2.821477 | -0.557868 |
| 6                  | 3.148090       | 2.667612  | 1.149212  | 6                         | 2.574966  | -1.845401 | 1.980814  |
| 1                  | 3.517230       | 3.345555  | 1.932049  | 1                         | 2.562031  | -1.097598 | 2.775351  |
| 1                  | 3.238851       | 3.192755  | 0.197742  | 1                         | 1.547534  | -2.148366 | 1.760790  |
| 1                  | 2.083096       | 2.488072  | 1.332103  | 1                         | 3.102215  | -2.726208 | 2.372643  |
| 6                  | 5.443494       | 1.653919  | 0.941157  | 6                         | 4.776629  | -1.081991 | 1.029781  |
| 1                  | 5.609385       | 2.127693  | -0.029865 | 1                         | 5.345808  | -0.733088 | 0.163762  |
| 1                  | 5.812478       | 2.353113  | 1.706318  | 1                         | 4.898394  | -0.352969 | 1.834612  |
| 1                  | 6.067756       | 0.757800  | 0.990382  | 1                         | 5.245249  | -2.015334 | 1.372421  |
| 6                  | 3.810274       | 0.833504  | 2.647967  | 6                         | 1.768889  | 2.850781  | 0.684482  |
| 1                  | 4.436255       | -0.036521 | 2.857995  | 1                         | 2.007255  | 3.722132  | 1.310761  |
| 1                  | 4.122032       | 1.629521  | 3.338473  | 1                         | 1.757574  | 3.190854  | -0.351007 |
| 1                  | 2.771836       | 0.579491  | 2.887447  | 1                         | 0.759817  | 2.521315  | 0.939257  |
| 6                  | 2.638637       | -0.141765 | -2.798374 | 6                         | 4.215884  | 2.298230  | 0.654541  |
| 1                  | 2.655021       | -1.231330 | -2.765134 | 1                         | 4.306599  | 2.648677  | -0.376715 |
| 1                  | 1.618159       | 0.183714  | -2.568396 | 1                         | 4.407113  | 3.164626  | 1.304102  |
| 1                  | 2.865450       | 0.159272  | -3.831128 | 1                         | 5.010742  | 1.572254  | 0.837686  |
| 6                  | 5.083431       | 0.088128  | -2.236982 | 6                         | 2.713835  | 1.457252  | 2.477626  |
| 1                  | 5.850402       | 0.543535  | -1.604499 | 1                         | 3.499028  | 0.791534  | 2.841553  |
| 1                  | 5.215846       | -0.995866 | -2.197457 | 1                         | 2.818508  | 2.406716  | 3.019892  |
| 1                  | 5.285660       | 0.399376  | -3.272566 | 1                         | 1.741668  | 1.031219  | 2.748938  |
| 6                  | 3.524373       | 2.038961  | -2.085346 | 6                         | 1.991447  | -0.648781 | -2.724699 |
| 1                  | 3.647634       | 2.235846  | -3.159498 | 1                         | 2.215780  | -1.685838 | -2.475466 |
| 1                  | 2.535396       | 2.411068  | -1.795079 | 1                         | 0.913741  | -0.504762 | -2.588502 |
| 1                  | 4.283764       | 2.626564  | -1.563615 | 1                         | 2.215301  | -0.504538 | -3.790877 |
|                    |                |           |           | 6                         | 4.303468  | 0.210053  | -2.207893 |
|                    |                |           |           | 1                         | 4.925779  | 0.911169  | -1.646013 |
|                    |                |           |           | 1                         | 4.669429  | -0.799799 | -2.011637 |
|                    |                |           |           | 1                         | 4.469925  | 0.409624  | -3.276201 |
|                    |                |           |           | 6                         | 2.367524  | 1.770065  | -2.398490 |
|                    |                |           |           | 1                         | 2.481312  | 1.795693  | -3.490954 |
|                    |                |           |           | 1                         | 1.319499  | 1.984725  | -2.172470 |
|                    |                |           |           | 1                         | 2.982552  | 2.578338  | -1.995608 |
| <b>Cb</b>          |                |           |           | <b>TS<sub>Cb-Cc</sub></b> |           |           |           |
| E <sub>gas</sub> : | -1130.72202450 |           |           |                           |           |           |           |
| E <sub>sol</sub> : | -1130.72070990 |           |           |                           |           |           |           |
| G <sub>sol</sub> : | -1130.13756240 |           |           |                           |           |           |           |
| 6                  | -1.828796      | 2.271572  | 0.466855  |                           |           |           |           |
| 6                  | -2.132970      | 3.610878  | 0.201945  |                           |           |           |           |
| 6                  | -1.452885      | 1.421920  | -0.595811 |                           |           |           |           |
| 6                  | -2.081957      | 4.091422  | -1.112117 |                           |           |           |           |
| 6                  | -1.402719      | 1.897357  | -1.899506 |                           |           |           |           |

|                      |                |                  |           |    |           |           |           |
|----------------------|----------------|------------------|-----------|----|-----------|-----------|-----------|
| E <sub>gas</sub> :   | -1130.71451582 |                  |           | 1  | 5.010843  | 0.794082  | -1.245650 |
| E <sub>sol</sub> :   | -1130.71370167 |                  |           | 1  | 4.828424  | -0.963127 | -1.329632 |
| G <sub>sol</sub> :   | -1130.12513285 |                  |           | 1  | 4.840419  | -0.008501 | -2.807989 |
| imaginary frequency: | 135.4834i      | cm <sup>-1</sup> |           | 6  | 2.626616  | 1.418972  | -2.558268 |
| 6                    | -2.024051      | 2.061710         | 0.578826  | 1  | 2.931843  | 1.257398  | -3.600584 |
| 6                    | -2.462341      | 3.392294         | 0.494824  | 1  | 1.556155  | 1.637027  | -2.561546 |
| 6                    | -1.269396      | 1.502724         | -0.477482 | 1  | 3.158711  | 2.303887  | -2.201047 |
| 6                    | -2.227757      | 4.128325         | -0.668095 |    |           |           |           |
| 6                    | -1.069063      | 2.231233         | -1.647269 |    |           |           |           |
| 6                    | -1.562957      | 3.540083         | -1.747837 |    |           |           |           |
| 1                    | -3.005271      | 3.845009         | 1.320688  |    |           |           |           |
| 1                    | -2.582569      | 5.152832         | -0.741493 |    |           |           |           |
| 1                    | -0.540201      | 1.796651         | -2.491457 |    |           |           |           |
| 1                    | -1.419209      | 4.100362         | -2.668595 |    |           |           |           |
| 14                   | -3.095445      | -0.845602        | -0.688932 |    |           |           |           |
| 6                    | -4.404359      | 0.512786         | -0.818576 |    |           |           |           |
| 1                    | -4.041994      | 1.419812         | -1.308101 |    |           |           |           |
| 1                    | -5.216337      | 0.104050         | -1.436269 |    |           |           |           |
| 1                    | -4.831308      | 0.788098         | 0.150384  |    |           |           |           |
| 6                    | -2.586551      | -1.232154        | -2.478152 |    |           |           |           |
| 1                    | -3.504313      | -1.453363        | -3.042863 |    |           |           |           |
| 1                    | -2.097993      | -0.381612        | -2.964794 |    |           |           |           |
| 1                    | -1.925811      | -2.100495        | -2.531447 | 14 | -4.848843 | 0.112035  | 0.078285  |
| 6                    | -2.076241      | -0.202355        | 1.377172  | 6  | -6.155633 | 1.427998  | 0.481988  |
| 6                    | -2.332441      | 1.115706         | 1.647349  | 1  | -5.750570 | 2.441156  | 0.372963  |
| 6                    | -2.156680      | -1.305330        | 2.408289  | 1  | -7.013560 | 1.342137  | -0.196773 |
| 1                    | -1.986635      | -2.286435        | 1.967780  | 1  | -6.536949 | 1.333661  | 1.505827  |
| 1                    | -1.394166      | -1.160889        | 3.185244  | 6  | -4.277608 | 0.333248  | -1.703066 |
| 1                    | -3.137729      | -1.317364        | 2.901608  | 1  | -5.119668 | 0.099424  | -2.368210 |
| 6                    | -2.916055      | 1.605048         | 2.949901  | 1  | -3.941489 | 1.347664  | -1.931722 |
| 1                    | -3.057081      | 0.800315         | 3.673274  | 1  | -3.462793 | -0.358524 | -1.939394 |
| 1                    | -2.263284      | 2.360823         | 3.406213  | 6  | -3.531308 | 0.140293  | 1.455540  |
| 1                    | -3.889983      | 2.085941         | 2.785417  | 6  | -2.246577 | 0.561396  | 1.379710  |
| 46                   | -0.635889      | -0.383226        | -0.127715 | 6  | -4.061943 | -0.487127 | 2.743548  |
| 15                   | 2.124591       | 0.220833         | 0.016935  | 1  | -3.876274 | -1.569662 | 2.770716  |
| 6                    | 2.534182       | 1.981261         | 0.808674  | 1  | -3.619098 | -0.050060 | 3.644341  |
| 35                   | -0.296291      | -3.003141        | -0.165161 | 1  | -5.146600 | -0.356975 | 2.834021  |
| 6                    | 2.963004       | 0.146481         | -1.752088 | 6  | -1.236372 | 0.382603  | 2.492826  |
| 6                    | 3.017711       | -1.116593        | 1.165481  | 1  | -0.355240 | -0.139239 | 2.096656  |
| 6                    | -3.948692      | -2.377631        | 0.004241  | 1  | -0.890585 | 1.353295  | 2.876190  |
| 1                    | -4.466038      | -2.186354        | 0.949341  | 1  | -1.614689 | -0.204233 | 3.331245  |
| 1                    | -4.704110      | -2.683412        | -0.732473 | 46 | 0.406698  | -0.742977 | -0.338248 |
| 1                    | -3.252693      | -3.208917        | 0.136913  | 15 | 2.633100  | 0.121985  | 0.182607  |
| 6                    | 3.213690       | -2.456543        | 0.420862  | 6  | 2.899259  | 1.608195  | 1.422780  |
| 1                    | 3.979468       | -2.403809        | -0.355705 | 35 | -1.338619 | -2.341200 | -1.035473 |
| 1                    | 3.556462       | -3.197157        | 1.156083  | 6  | 3.603963  | 0.511238  | -1.476924 |
| 1                    | 2.285231       | -2.834586        | -0.007777 | 6  | 3.385012  | -1.510009 | 0.971271  |
| 6                    | 2.072224       | -1.408310        | 2.355384  | 6  | -5.668860 | -1.594223 | 0.166576  |
| 1                    | 1.863361       | -0.530010        | 2.968739  | 1  | -6.138038 | -1.801249 | 1.134494  |
| 1                    | 1.126816       | -1.832042        | 2.008971  | 1  | -6.448404 | -1.676659 | -0.601127 |
| 1                    | 2.552252       | -2.153581        | 3.004115  | 1  | -4.930848 | -2.381754 | -0.026108 |
| 6                    | 4.400376       | -0.702443        | 1.714014  | 6  | 3.476658  | -2.607292 | -0.114547 |
| 1                    | 5.122800       | -0.482373        | 0.923293  | 1  | 4.271974  | -2.424815 | -0.839974 |
| 1                    | 4.361563       | 0.150134         | 2.394269  | 1  | 3.701756  | -3.561879 | 0.378112  |
| 1                    | 4.800779       | -1.548385        | 2.288991  | 1  | 2.534244  | -2.740387 | -0.658506 |
| 6                    | 1.632610       | 3.074816         | 0.194304  | 6  | 2.387922  | -2.044984 | 2.030333  |
| 1                    | 1.938775       | 4.041324         | 0.617962  | 1  | 2.227104  | -1.360786 | 2.863137  |
| 1                    | 1.713599       | 3.156102         | -0.888874 | 1  | 1.409256  | -2.279757 | 1.594508  |
| 1                    | 0.583402       | 2.922648         | 0.444043  | 1  | 2.790914  | -2.978978 | 2.443807  |
| 6                    | 3.997131       | 2.446940         | 0.640893  | 6  | 4.770751  | -1.354114 | 1.629891  |
| 1                    | 4.234283       | 2.677603         | -0.401192 | 1  | 5.528671  | -0.974175 | 0.941406  |
| 1                    | 4.131663       | 3.377243         | 1.209955  | 1  | 4.748554  | -0.703062 | 2.507127  |
| 1                    | 4.734048       | 1.733007         | 1.007780  | 1  | 5.107173  | -2.341749 | 1.973248  |
| 6                    | 2.174004       | 1.955550         | 2.311214  | 6  | 1.931893  | 2.746944  | 1.023126  |
| 1                    | 2.856782       | 1.356038         | 2.915219  | 1  | 2.026532  | 3.553954  | 1.761852  |
| 1                    | 2.220399       | 2.983394         | 2.694992  | 1  | 2.148078  | 3.176071  | 0.044418  |
| 1                    | 1.153973       | 1.592470         | 2.474350  | 1  | 0.892238  | 2.411781  | 1.019984  |
| 6                    | 2.311666       | -1.035803        | -2.505661 | 6  | 4.340712  | 2.156336  | 1.475368  |
| 1                    | 2.481524       | -2.001076        | -2.029279 | 1  | 4.657115  | 2.612182  | 0.535104  |
| 1                    | 1.228039       | -0.904533        | -2.595186 | 1  | 4.384765  | 2.941700  | 2.241865  |
| 1                    | 2.729921       | -1.081883        | -3.520602 | 1  | 5.073198  | 1.393030  | 1.749503  |
| 6                    | 4.497299       | -0.018780        | -1.764094 | 6  | 2.504781  | 1.183127  | 2.854062  |



|   |          |           |           |
|---|----------|-----------|-----------|
| 1 | 3.210281 | 0.478073  | 3.299020  |
| 1 | 2.505002 | 2.079938  | 3.487058  |
| 1 | 1.501174 | 0.755347  | 2.899308  |
| 6 | 3.044961 | -0.405108 | -2.592286 |
| 1 | 3.281575 | -1.458886 | -2.442368 |
| 1 | 1.958373 | -0.320855 | -2.686679 |
| 1 | 3.493174 | -0.103561 | -3.548253 |
| 6 | 5.132220 | 0.318808  | -1.398355 |
| 1 | 5.598968 | 0.931305  | -0.623379 |
| 1 | 5.414920 | -0.722414 | -1.229740 |
| 1 | 5.571361 | 0.618413  | -2.359512 |
| 6 | 3.325426 | 1.965494  | -1.921720 |
| 1 | 3.725109 | 2.094488  | -2.936015 |
| 1 | 2.258887 | 2.196775  | -1.956959 |
| 1 | 3.818144 | 2.705946  | -1.288762 |

**TS<sub>cc-cd</sub>**

E<sub>gas</sub>: -1130.72927937  
E<sub>sol</sub>: -1130.72825188  
G<sub>sol</sub>: -1130.14575851  
imaginary frequency: 66.9629i cm<sup>-1</sup>

|    |           |           |           |
|----|-----------|-----------|-----------|
| 6  | -2.195040 | 1.289875  | 0.555445  |
| 6  | -2.949037 | 2.473673  | 0.679372  |
| 6  | -1.151510 | 1.311689  | -0.388322 |
| 6  | -2.735342 | 3.581679  | -0.140822 |
| 6  | -0.968723 | 2.382588  | -1.265993 |
| 6  | -1.750096 | 3.534477  | -1.126523 |
| 1  | -3.726068 | 2.502787  | 1.439081  |
| 1  | -3.349757 | 4.470006  | -0.021021 |
| 1  | -0.221805 | 2.325496  | -2.052581 |
| 1  | -1.590970 | 4.377297  | -1.794223 |
| 14 | -4.993101 | -0.534603 | 0.141590  |
| 6  | -6.578919 | 0.085590  | 0.980408  |
| 1  | -6.493399 | 1.142257  | 1.261732  |
| 1  | -7.436046 | -0.005584 | 0.301340  |
| 1  | -6.819776 | -0.478563 | 1.889156  |
| 6  | -4.703684 | 0.473620  | -1.422617 |
| 1  | -5.517706 | 0.258605  | -2.127712 |
| 1  | -4.688658 | 1.552598  | -1.246920 |
| 1  | -3.761130 | 0.193516  | -1.903349 |
| 6  | -3.617713 | -0.568946 | 1.457135  |
| 6  | -2.477740 | 0.156796  | 1.493799  |
| 6  | -3.876656 | -1.634169 | 2.523460  |
| 1  | -3.290542 | -2.544212 | 2.335670  |
| 1  | -3.631310 | -1.284635 | 3.532761  |
| 1  | -4.927784 | -1.940114 | 2.545365  |
| 6  | -1.382330 | -0.043575 | 2.523992  |
| 1  | -0.434774 | -0.267179 | 2.009295  |
| 1  | -1.214291 | 0.873878  | 3.105417  |
| 1  | -1.583051 | -0.862600 | 3.216902  |
| 46 | 0.345125  | 0.029630  | -0.402221 |
| 15 | 2.883087  | -0.078431 | 0.208654  |
| 6  | 3.303963  | 0.880119  | 1.858696  |
| 35 | -1.076149 | -1.337393 | -1.871361 |
| 6  | 3.897241  | 0.714700  | -1.262156 |
| 6  | 3.400664  | -1.952931 | 0.407039  |
| 6  | -5.253871 | -2.330000 | -0.403772 |
| 1  | -5.493658 | -3.003011 | 0.426946  |
| 1  | -6.077925 | -2.392561 | -1.125575 |
| 1  | -4.351841 | -2.711591 | -0.896433 |
| 6  | 3.388035  | -2.630975 | -0.980827 |
| 1  | 4.219076  | -2.315315 | -1.615403 |
| 1  | 3.488017  | -3.714354 | -0.834971 |
| 1  | 2.447954  | -2.459677 | -1.515448 |
| 6  | 2.299878  | -2.661926 | 1.233187  |
| 1  | 2.232653  | -2.308502 | 2.262490  |
| 1  | 1.314907  | -2.548825 | 0.767634  |
| 1  | 2.529569  | -3.735145 | 1.270519  |
| 6  | 4.773311  | -2.195676 | 1.064175  |
| 1  | 5.590696  | -1.711348 | 0.523502  |
| 1  | 4.806380  | -1.860073 | 2.103833  |
| 1  | 4.978355  | -3.274878 | 1.069622  |

|   |          |           |           |
|---|----------|-----------|-----------|
| 6 | 2.479886 | 2.191261  | 1.863822  |
| 1 | 2.623840 | 2.693965  | 2.829640  |
| 1 | 2.776242 | 2.894229  | 1.085155  |
| 1 | 1.408404 | 1.993797  | 1.749729  |
| 6 | 4.794135 | 1.213770  | 2.071434  |
| 1 | 5.182852 | 1.901968  | 1.317058  |
| 1 | 4.913112 | 1.706350  | 3.046228  |
| 1 | 5.426226 | 0.321979  | 2.076271  |
| 6 | 2.809987 | 0.065866  | 3.074489  |
| 1 | 3.402785 | -0.833154 | 3.255546  |
| 1 | 2.897351 | 0.695691  | 3.969411  |
| 1 | 1.758147 | -0.220640 | 2.979859  |
| 6 | 3.244117 | 0.262062  | -2.590849 |
| 1 | 3.362090 | -0.802486 | -2.791939 |
| 1 | 2.172967 | 0.487581  | -2.610794 |
| 1 | 3.721846 | 0.805812  | -3.416816 |
| 6 | 5.400520 | 0.375369  | -1.298109 |
| 1 | 5.923646 | 0.669948  | -0.384779 |
| 1 | 5.582116 | -0.689088 | -1.467114 |
| 1 | 5.867703 | 0.916379  | -2.132341 |
| 6 | 3.736112 | 2.250340  | -1.215587 |
| 1 | 4.142570 | 2.669773  | -2.145003 |
| 1 | 2.684275 | 2.549851  | -1.155032 |
| 1 | 4.280147 | 2.714796  | -0.390225 |

**Cd**

E<sub>gas</sub>: -1130.73420330  
E<sub>sol</sub>: -1130.73250130  
G<sub>sol</sub>: -1130.150674000

|    |           |           |           |
|----|-----------|-----------|-----------|
| 6  | -2.435368 | 1.224738  | 0.754311  |
| 6  | -3.388312 | 2.238282  | 0.966314  |
| 6  | -1.342768 | 1.537543  | -0.080370 |
| 6  | -3.305802 | 3.475756  | 0.324477  |
| 6  | -1.291468 | 2.745936  | -0.783628 |
| 6  | -2.259851 | 3.731359  | -0.561382 |
| 1  | -4.210770 | 2.035704  | 1.648106  |
| 1  | -4.068298 | 4.229202  | 0.504320  |
| 1  | -0.499590 | 2.922008  | -1.507863 |
| 1  | -2.200705 | 4.679031  | -1.090774 |
| 14 | -4.848147 | -0.914523 | -0.145503 |
| 6  | -6.557434 | -0.580610 | 0.606986  |
| 1  | -6.627274 | 0.441364  | 0.998631  |
| 1  | -7.342857 | -0.697221 | -0.150349 |
| 1  | -6.791568 | -1.266144 | 1.430128  |
| 6  | -4.557971 | 0.288140  | -1.565651 |
| 1  | -5.259047 | 0.044468  | -2.375074 |
| 1  | -4.718122 | 1.333126  | -1.287040 |
| 1  | -3.542068 | 0.195522  | -1.963295 |
| 6  | -3.574147 | -0.948963 | 1.269582  |
| 6  | -2.575738 | -0.066600 | 1.500813  |
| 6  | -3.730994 | -2.194219 | 2.140024  |
| 1  | -3.108088 | -3.022199 | 1.774690  |
| 1  | -3.467146 | -2.018583 | 3.188178  |
| 1  | -4.764199 | -2.559694 | 2.134482  |
| 6  | -1.509764 | -0.243165 | 2.566427  |
| 1  | -0.519294 | -0.284396 | 2.082797  |
| 1  | -1.487816 | 0.615718  | 3.251014  |
| 1  | -1.623329 | -1.155757 | 3.154505  |
| 46 | 0.389280  | 0.568700  | -0.090618 |
| 15 | 2.798328  | -0.170939 | 0.150174  |
| 6  | 3.360823  | 0.457230  | 1.915248  |
| 35 | -0.586564 | -0.751794 | -1.957069 |
| 6  | 3.882572  | 0.722076  | -1.206336 |
| 6  | 3.081378  | -2.094744 | 0.039201  |
| 6  | -4.848174 | -2.653488 | -0.899353 |
| 1  | -5.072989 | -3.439253 | -0.169922 |
| 1  | -5.598319 | -2.720613 | -1.697219 |
| 1  | -3.871381 | -2.877232 | -1.344644 |
| 6  | 2.984285  | -2.543845 | -1.436035 |
| 1  | 3.850101  | -2.240698 | -2.029436 |
| 1  | 2.950198  | -3.641184 | -1.457111 |
| 1  | 2.071827  | -2.176360 | -1.914684 |

|                    |                |           |           |                           |                                                 |           |           |
|--------------------|----------------|-----------|-----------|---------------------------|-------------------------------------------------|-----------|-----------|
| 6                  | 1.901204       | -2.781658 | 0.768305  | 6                         | 3.299788                                        | 3.674952  | -0.211945 |
| 1                  | 1.869782       | -2.573367 | 1.838510  | 1                         | 2.209623                                        | 3.737835  | -0.309493 |
| 1                  | 0.943299       | -2.488988 | 0.328145  | 1                         | 3.579626                                        | 4.190865  | 0.712826  |
| 1                  | 2.006264       | -3.868580 | 0.651320  | 1                         | 3.737454                                        | 4.237249  | -1.046132 |
| 6                  | 4.416255       | -2.602362 | 0.620497  | 6                         | -4.141867                                       | 1.919726  | 1.792370  |
| 1                  | 5.286308       | -2.155293 | 0.131808  | 1                         | -4.932741                                       | 1.998561  | 1.041164  |
| 1                  | 4.504415       | -2.428929 | 1.695881  | 1                         | -4.630967                                       | 1.810296  | 2.769975  |
| 1                  | 4.477494       | -3.688113 | 0.465102  | 1                         | -3.596496                                       | 2.866412  | 1.812189  |
| 6                  | 2.675246       | 1.826264  | 2.152071  | 6                         | -4.061708                                       | -0.583265 | 1.710600  |
| 1                  | 2.886069       | 2.160201  | 3.176961  | 1                         | -4.942132                                       | -0.595703 | 1.063498  |
| 1                  | 3.016125       | 2.610703  | 1.476236  | 1                         | -3.466368                                       | -1.482039 | 1.526018  |
| 1                  | 1.582624       | 1.748946  | 2.058025  | 1                         | -4.425078                                       | -0.633476 | 2.745661  |
| 6                  | 4.880294       | 0.604818  | 2.128343  | 6                         | -2.149002                                       | 0.642749  | 2.674211  |
| 1                  | 5.326442       | 1.355948  | 1.472050  | 1                         | -1.515533                                       | -0.242150 | 2.561451  |
| 1                  | 5.068600       | 0.927828  | 3.161602  | 1                         | -1.508060                                       | 1.524551  | 2.711328  |
| 1                  | 5.414741       | -0.337241 | 1.978821  | 1                         | -2.658528                                       | 0.569577  | 3.644454  |
| 6                  | 2.808887       | -0.478892 | 3.013730  | 6                         | -3.724287                                       | -1.366074 | -1.501623 |
| 1                  | 3.294452       | -1.456567 | 3.028985  | 1                         | -4.334643                                       | -1.679190 | -2.359625 |
| 1                  | 2.994013       | -0.011782 | 3.990080  | 1                         | -2.765845                                       | -1.890071 | -1.555248 |
| 1                  | 1.728433       | -0.629099 | 2.925867  | 1                         | -4.232554                                       | -1.703518 | -0.598895 |
| 6                  | 3.172330       | 0.559435  | -2.572385 | 6                         | -4.921243                                       | 0.850100  | -1.510274 |
| 1                  | 3.169789       | -0.466539 | -2.938896 | 1                         | -4.858345                                       | 1.940626  | -1.549092 |
| 1                  | 2.133038       | 0.897879  | -2.534358 | 1                         | -5.514090                                       | 0.525147  | -2.376460 |
| 1                  | 3.704895       | 1.170808  | -3.313380 | 1                         | -5.485415                                       | 0.572669  | -0.616531 |
| 6                  | 5.335824       | 0.224253  | -1.332109 | 6                         | -2.903338                                       | 0.458261  | -2.944399 |
| 1                  | 5.900700       | 0.324260  | -0.401853 | 1                         | -1.902318                                       | 0.021542  | -3.031761 |
| 1                  | 5.390186       | -0.818437 | -1.654328 | 1                         | -3.528744                                       | -0.004803 | -3.718650 |
| 1                  | 5.852152       | 0.823093  | -2.094918 | 1                         | -2.843826                                       | 1.524030  | -3.177376 |
| 6                  | 3.901230       | 2.240117  | -0.920464 | 6                         | -2.653271                                       | 3.514167  | -1.018356 |
| 1                  | 4.356352       | 2.749242  | -1.779832 | 1                         | -2.155278                                       | 4.483242  | -1.161671 |
| 1                  | 2.890084       | 2.645149  | -0.801638 | 1                         | -3.103141                                       | 3.241743  | -1.976404 |
| 1                  | 4.491278       | 2.507664  | -0.041050 | 1                         | -3.459322                                       | 3.666772  | -0.295729 |
|                    |                |           |           | 6                         | -0.909556                                       | 3.046177  | 0.717261  |
|                    |                |           |           | 1                         | -0.388411                                       | 3.970666  | 0.434915  |
|                    |                |           |           | 1                         | -1.601941                                       | 3.301390  | 1.522114  |
|                    |                |           |           | 1                         | -0.156309                                       | 2.354296  | 1.109012  |
|                    |                |           |           | 6                         | -0.508913                                       | 2.330825  | -1.605240 |
|                    |                |           |           | 1                         | 0.279550                                        | 1.644623  | -1.265945 |
|                    |                |           |           | 1                         | -0.873226                                       | 1.975617  | -2.568953 |
|                    |                |           |           | 1                         | -0.032145                                       | 3.306182  | -1.771352 |
|                    |                |           |           |                           |                                                 |           |           |
| <b>Ce</b>          |                |           |           | <b>TS<sub>Ce-Cf</sub></b> |                                                 |           |           |
| E <sub>gas</sub> : | -1130.73076910 |           |           | E <sub>gas</sub> :        | -1130.68860306                                  |           |           |
| E <sub>sol</sub> : | -1130.73379184 |           |           | E <sub>sol</sub> :        | -1130.69184944                                  |           |           |
| G <sub>sol</sub> : | -1130.15151574 |           |           | G <sub>sol</sub> :        | -1130.10366638                                  |           |           |
| 6                  | 2.662467       | -1.235058 | 0.149966  |                           | imaginary frequency: 174.5686i cm <sup>-1</sup> |           |           |
| 6                  | 3.912264       | -1.723303 | -0.271933 | 6                         | 3.482123                                        | -0.415970 | 0.000290  |
| 6                  | 1.515170       | -1.726684 | -0.502628 | 6                         | 4.733758                                        | -0.922924 | -0.402155 |
| 6                  | 4.020749       | -2.659646 | -1.301511 | 6                         | 2.381976                                        | -0.642830 | -0.847609 |
| 6                  | 1.613815       | -2.685061 | -1.515342 | 6                         | 4.891215                                        | -1.611193 | -1.602591 |
| 6                  | 2.871061       | -3.135023 | -1.932751 | 6                         | 2.537993                                        | -1.322535 | -2.057817 |
| 1                  | 4.805261       | -1.362885 | 0.233370  | 6                         | 3.790929                                        | -1.813157 | -2.436632 |
| 1                  | 5.000067       | -3.027187 | -1.597065 | 1                         | 5.601809                                        | -0.758338 | 0.229835  |
| 1                  | 0.716075       | -3.090867 | -1.971812 | 1                         | 5.871068                                        | -1.985438 | -1.886969 |
| 1                  | 2.943907       | -3.874640 | -2.726296 | 1                         | 1.680745                                        | -1.503758 | -2.700903 |
| 14                 | 3.895154       | 1.871915  | -0.259845 | 1                         | 3.898404                                        | -2.359367 | -3.370503 |
| 6                  | 5.780861       | 1.880506  | -0.062254 | 14                        | 1.769388                                        | 2.084844  | -0.319037 |
| 1                  | 6.197680       | 0.872343  | -0.168209 | 6                         | 3.193748                                        | 2.667911  | -1.422375 |
| 1                  | 6.250065       | 2.515772  | -0.823771 | 1                         | 3.786076                                        | 1.834290  | -1.809325 |
| 1                  | 6.084812       | 2.262449  | 0.919425  | 1                         | 2.836938                                        | 3.264257  | -2.269718 |
| 6                  | 3.465528       | 1.212226  | -1.978404 | 1                         | 3.859244                                        | 3.300543  | -0.822323 |
| 1                  | 3.899046       | 0.229054  | -2.176927 | 6                         | 0.601743                                        | 1.330222  | -2.086733 |
| 1                  | 2.384035       | 1.132949  | -2.132185 | 1                         | 1.484893                                        | 1.323935  | -2.724045 |
| 1                  | 3.852571       | 1.912332  | -2.730313 | 1                         | -0.053290                                       | 0.537088  | -2.468363 |
| 6                  | 3.131510       | 0.983047  | 1.237576  | 1                         | 0.046247                                        | 2.264653  | -2.183342 |
| 6                  | 2.600799       | -0.264402 | 1.293404  | 6                         | 2.525012                                        | 1.435949  | 1.302125  |
| 6                  | 3.172203       | 1.827819  | 2.510491  | 6                         | 3.335170                                        | 0.348748  | 1.269039  |
| 1                  | 2.220623       | 2.350902  | 2.685649  | 6                         | 2.227462                                        | 2.234136  | 2.555767  |
| 1                  | 3.379195       | 1.224651  | 3.401066  | 1                         | 1.146119                                        | 2.344475  | 2.703657  |
| 1                  | 3.945434       | 2.602728  | 2.462191  | 1                         | 2.627874                                        | 1.773483  | 3.462357  |
| 6                  | 2.022209       | -0.848840 | 2.574438  | 1                         | 2.637508                                        | 3.252224  | 2.499057  |
| 1                  | 1.484116       | -0.104964 | 3.170072  | 6                         | 4.104941                                        | -0.203475 | 2.447723  |
| 1                  | 1.337356       | -1.671782 | 2.357708  |                           |                                                 |           |           |
| 1                  | 2.828697       | -1.253753 | 3.204408  |                           |                                                 |           |           |
| 46                 | -0.218766      | -0.802772 | -0.209422 |                           |                                                 |           |           |
| 15                 | -2.288234      | 0.683816  | -0.155491 |                           |                                                 |           |           |
| 6                  | -1.615924      | 2.482452  | -0.535450 |                           |                                                 |           |           |
| 35                 | -0.933413      | -2.922860 | 0.875807  |                           |                                                 |           |           |
| 6                  | -3.222353      | 0.704633  | 1.560763  |                           |                                                 |           |           |
| 6                  | -3.540242      | 0.168632  | -1.567674 |                           |                                                 |           |           |

|    |           |           |           |    |           |           |           |
|----|-----------|-----------|-----------|----|-----------|-----------|-----------|
| 1  | 3.918342  | 0.343113  | 3.373108  | 1  | -0.318067 | 0.621016  | -2.893208 |
| 1  | 3.831250  | -1.253467 | 2.607120  | 6  | 2.903673  | 1.831812  | 0.443257  |
| 1  | 5.187419  | -0.175120 | 2.269163  | 6  | 3.612021  | 0.747298  | 0.841313  |
| 46 | 0.478018  | -0.103765 | -0.378855 | 6  | 2.858158  | 3.152800  | 1.180538  |
| 15 | -2.378025 | -0.037707 | -0.062457 | 1  | 1.852101  | 3.340922  | 1.580785  |
| 6  | -3.333046 | 1.387450  | -1.057709 | 1  | 3.556616  | 3.203557  | 2.019682  |
| 35 | 0.632292  | -2.038038 | 1.269364  | 1  | 3.091572  | 3.995533  | 0.516040  |
| 6  | -2.822506 | 0.204762  | 1.852159  | 6  | 4.514187  | 0.719397  | 2.057510  |
| 6  | -3.026788 | -1.755719 | -0.806803 | 1  | 4.289824  | 1.529913  | 2.752291  |
| 6  | 0.773188  | 3.637043  | 0.109720  | 1  | 4.390395  | -0.224928 | 2.596903  |
| 1  | -0.049541 | 3.448873  | 0.804310  | 1  | 5.574523  | 0.808139  | 1.783569  |
| 1  | 1.452191  | 4.350934  | 0.592679  | 46 | 0.458754  | -0.201431 | -0.424051 |
| 1  | 0.367825  | 4.129597  | -0.780136 | 15 | -2.419650 | -0.083949 | -0.005753 |
| 6  | -4.199341 | 0.821612  | 2.158835  | 6  | -3.505327 | 0.611652  | -1.521127 |
| 1  | -5.021966 | 0.256705  | 1.709592  | 35 | 0.736756  | -0.630485 | 2.138633  |
| 1  | -4.348926 | 0.804813  | 3.247091  | 6  | -2.876284 | 1.042998  | 1.567494  |
| 1  | -4.278676 | 1.865604  | 1.846536  | 6  | -2.939676 | -1.975253 | 0.244702  |
| 6  | -2.736468 | -1.111829 | 2.650334  | 6  | 0.694025  | 3.146907  | -1.280393 |
| 1  | -3.610208 | -1.746763 | 2.486257  | 1  | 0.012192  | 3.277258  | -0.437402 |
| 1  | -1.828650 | -1.677651 | 2.438976  | 1  | 1.313724  | 4.050896  | -1.357391 |
| 1  | -2.724409 | -0.852889 | 3.718014  | 1  | 0.103489  | 3.078914  | -2.198430 |
| 6  | -1.719525 | 1.137068  | 2.403822  | 6  | -4.285418 | 1.664461  | 1.567208  |
| 1  | -0.734869 | 0.665816  | 2.330576  | 1  | -5.078438 | 0.917782  | 1.464323  |
| 1  | -1.683415 | 2.102280  | 1.890609  | 1  | -4.433468 | 2.165953  | 2.533123  |
| 1  | -1.921450 | 1.336835  | 3.465195  | 1  | -4.414341 | 2.425936  | 0.795462  |
| 6  | -2.782450 | -2.954992 | 0.134027  | 6  | -2.735872 | 0.289394  | 2.905857  |
| 1  | -2.893839 | -3.870385 | -0.463136 | 1  | -3.572409 | -0.393111 | 3.078850  |
| 1  | -1.778713 | -2.960745 | 0.561622  | 1  | -1.792824 | -0.248800 | 2.993768  |
| 1  | -3.517670 | -3.010201 | 0.938539  | 1  | -2.763338 | 1.038297  | 3.709206  |
| 6  | -4.515924 | -1.789752 | -1.199451 | 6  | -1.836414 | 2.185392  | 1.570173  |
| 1  | -4.761341 | -1.120291 | -2.026730 | 1  | -0.823147 | 1.794858  | 1.696887  |
| 1  | -4.765176 | -2.807889 | -1.528647 | 1  | -1.874266 | 2.787358  | 0.657717  |
| 1  | -5.171791 | -1.554841 | -0.354073 | 1  | -2.050983 | 2.855664  | 2.413812  |
| 6  | -2.152624 | -2.014127 | -2.058596 | 6  | -2.485773 | -2.533772 | 1.611010  |
| 1  | -1.101521 | -2.137440 | -1.777388 | 1  | -2.518451 | -3.630055 | 1.549287  |
| 1  | -2.482669 | -2.948881 | -2.531633 | 1  | -1.464211 | -2.243884 | 1.867685  |
| 1  | -2.218634 | -1.226374 | -2.811720 | 1  | -3.150041 | -2.240894 | 2.424120  |
| 6  | -4.868134 | 1.516700  | -0.906881 | 6  | -4.446406 | -2.258398 | 0.099184  |
| 1  | -5.216846 | 2.253184  | -1.644562 | 1  | -4.818384 | -2.093958 | -0.915133 |
| 1  | -5.405580 | 0.589636  | -1.100824 | 1  | -4.630884 | -3.314067 | 0.341694  |
| 1  | -5.171461 | 1.884905  | 0.071551  | 1  | -5.047349 | -1.658303 | 0.791222  |
| 6  | -2.711397 | 2.728617  | -0.619713 | 6  | -2.152696 | -2.783651 | -0.814825 |
| 1  | -3.098043 | 3.533212  | -1.260252 | 1  | -1.074336 | -2.723190 | -0.631033 |
| 1  | -2.966843 | 2.988601  | 0.411290  | 1  | -2.438595 | -3.840769 | -0.731062 |
| 1  | -1.624038 | 2.721332  | -0.707813 | 1  | -2.345017 | -2.474290 | -1.842577 |
| 6  | -3.051621 | 1.218895  | -2.569109 | 6  | -5.038001 | 0.757461  | -1.343654 |
| 1  | -1.992598 | 1.087497  | -2.795351 | 1  | -5.476675 | 0.918668  | -2.338094 |
| 1  | -3.603124 | 0.383041  | -3.006347 | 1  | -5.514484 | -0.127883 | -0.923115 |
| 1  | -3.385348 | 2.127576  | -3.088039 | 1  | -5.320075 | 1.614564  | -0.735840 |

### Cf

|                    |                |           |           |
|--------------------|----------------|-----------|-----------|
| E <sub>gas</sub> : | -1130.69695326 |           |           |
| E <sub>sol</sub> : | -1130.70031396 |           |           |
| G <sub>sol</sub> : | -1130.11346770 |           |           |
| 6                  | 3.528582       | -0.520785 | 0.066003  |
| 6                  | 4.675411       | -1.337914 | -0.017789 |
| 6                  | 2.368877       | -0.949916 | -0.622706 |
| 6                  | 4.693410       | -2.522148 | -0.747358 |
| 6                  | 2.401230       | -2.128316 | -1.378610 |
| 6                  | 3.548278       | -2.924056 | -1.431174 |
| 1                  | 5.579771       | -1.025133 | 0.494680  |
| 1                  | 5.598947       | -3.121716 | -0.785272 |
| 1                  | 1.516542       | -2.462601 | -1.909998 |
| 1                  | 3.535583       | -3.851655 | -1.997816 |
| 14                 | 1.845596       | 1.660941  | -1.085500 |
| 6                  | 2.888106       | 1.594363  | -2.660741 |
| 1                  | 3.546268       | 0.723080  | -2.697742 |
| 1                  | 2.273593       | 1.610701  | -3.566418 |
| 1                  | 3.516931       | 2.494461  | -2.673123 |
| 6                  | 0.223392       | -0.240088 | -2.496353 |
| 1                  | 1.165462       | -0.371772 | -3.026085 |
| 1                  | -0.379823      | -1.143633 | -2.616223 |

### TS<sub>cf-D</sub>

|                      |                |                  |           |
|----------------------|----------------|------------------|-----------|
| E <sub>gas</sub> :   | -1130.69543409 |                  |           |
| E <sub>sol</sub> :   | -1130.69876604 |                  |           |
| G <sub>sol</sub> :   | -1130.10880995 |                  |           |
| imaginary frequency: | 89.5916i       | cm <sup>-1</sup> |           |
| 6                    | 3.462110       | -0.561893        | -0.029655 |
| 6                    | 4.520779       | -1.441468        | -0.319713 |
| 6                    | 2.363256       | -0.504002        | -0.933399 |
| 6                    | 4.527420       | -2.234925        | -1.463270 |
| 6                    | 2.415216       | -1.269821        | -2.110696 |
| 6                    | 3.473629       | -2.143081        | -2.369853 |
| 1                    | 5.366759       | -1.489388        | 0.358597  |
| 1                    | 5.360834       | -2.906574        | -1.651667 |
| 1                    | 1.602627       | -1.231489        | -2.826009 |

|    |           |           |           |
|----|-----------|-----------|-----------|
| 1  | 3.460798  | -2.753216 | -3.269322 |
| 14 | 2.018809  | 1.812700  | -0.558754 |
| 6  | 3.170063  | 2.269315  | -1.993823 |
| 1  | 4.023407  | 1.591264  | -2.067908 |
| 1  | 2.658887  | 2.290144  | -2.961836 |
| 1  | 3.548474  | 3.282815  | -1.805639 |
| 6  | 0.064763  | 0.687228  | -2.432179 |
| 1  | 1.002621  | 0.877607  | -2.954191 |
| 1  | -0.441816 | -0.146409 | -2.926092 |
| 1  | -0.558909 | 1.578734  | -2.463525 |
| 6  | 2.953114  | 1.555811  | 1.034687  |
| 6  | 3.569857  | 0.353670  | 1.132576  |
| 6  | 2.914420  | 2.612177  | 2.112579  |
| 1  | 1.886727  | 2.769499  | 2.468177  |
| 1  | 3.525911  | 2.360552  | 2.983706  |
| 1  | 3.265255  | 3.583775  | 1.738862  |
| 6  | 4.383479  | -0.117137 | 2.315055  |
| 1  | 4.205553  | 0.493882  | 3.201705  |
| 1  | 4.123881  | -1.151357 | 2.563540  |
| 1  | 5.461794  | -0.084768 | 2.106883  |
| 46 | 0.343624  | -0.027692 | -0.492977 |
| 15 | -2.371014 | -0.060911 | -0.018910 |
| 6  | -3.497209 | 1.119450  | -1.163668 |
| 35 | 0.725203  | -1.348444 | 1.752323  |
| 6  | -2.761352 | 0.476817  | 1.858308  |
| 6  | -2.922022 | -1.920848 | -0.414620 |
| 6  | 0.847269  | 3.295924  | -0.393587 |
| 1  | 0.099385  | 3.171247  | 0.392461  |
| 1  | 1.457192  | 4.175608  | -0.145062 |
| 1  | 0.333212  | 3.509625  | -1.335386 |
| 6  | -4.143565 | 1.110622  | 2.105795  |
| 1  | -4.971787 | 0.469346  | 1.791751  |
| 1  | -4.246717 | 1.266475  | 3.187916  |
| 1  | -4.254913 | 2.089558  | 1.636362  |
| 6  | -2.649304 | -0.699913 | 2.848426  |
| 1  | -3.511607 | -1.369930 | 2.780008  |
| 1  | -1.727638 | -1.267355 | 2.730833  |
| 1  | -2.650620 | -0.278259 | 3.862932  |
| 6  | -1.681777 | 1.517968  | 2.228427  |
| 1  | -0.682175 | 1.078180  | 2.202902  |
| 1  | -1.703043 | 2.393966  | 1.572282  |
| 1  | -1.871897 | 1.871402  | 3.251309  |
| 6  | -2.437828 | -2.924367 | 0.655024  |
| 1  | -2.515679 | -3.930543 | 0.221085  |
| 1  | -1.397575 | -2.764673 | 0.946647  |
| 1  | -3.060155 | -2.914777 | 1.549898  |
| 6  | -4.439551 | -2.119120 | -0.582704 |
| 1  | -4.845904 | -1.615403 | -1.462743 |
| 1  | -4.638629 | -3.192253 | -0.707093 |
| 1  | -4.998005 | -1.787514 | 0.299231  |
| 6  | -2.194262 | -2.318667 | -1.720149 |
| 1  | -1.108680 | -2.320597 | -1.575917 |
| 1  | -2.492280 | -3.341673 | -1.986484 |
| 1  | -2.428836 | -1.678733 | -2.571303 |
| 6  | -5.021079 | 1.192486  | -0.875084 |
| 1  | -5.505344 | 1.633274  | -1.757022 |
| 1  | -5.486706 | 0.221890  | -0.707358 |
| 1  | -5.266241 | 1.835619  | -0.032642 |
| 6  | -2.935799 | 2.551014  | -1.024473 |
| 1  | -3.472661 | 3.213855  | -1.716873 |
| 1  | -3.078044 | 2.953926  | -0.018105 |
| 1  | -1.872029 | 2.611656  | -1.261526 |
| 6  | -3.377280 | 0.693611  | -2.645769 |
| 1  | -2.353578 | 0.533047  | -2.973544 |
| 1  | -3.956933 | -0.208036 | -2.860908 |
| 1  | -3.797921 | 1.496137  | -3.266473 |
